# Supplementary material
Source: PubMed Central journal article supplement (PMC9349541)
Supplement: JMV-94-5284-s001.pdf [file JMV-94-5284-s001.pdf]

## Readme

| Table | Title                                                                                               | Notes                                                                                                                                                  |
|-------|-----------------------------------------------------------------------------------------------------|--------------------------------------------------------------------------------------------------------------------------------------------------------|
| S1    | Detailed information of 69 inpatients with COVID-19                                                 | (1)binomial variables: 1 means "yes", 0 means "no"; (2)... means the lost                                                                              |
| S2    | Relative abundance of bacterial microbiome among each samples at different levels                   | The table showed relative abundance of bacterial microbiome among each samples at phylum, class, order, family and genus levels                        |
| S3    | Comparison the relative abundance of the top 10 bacterial microbiome between mild and severe groups | The top 10 relative abundance at the phylum, class, order, family and genus levels respectively were selected and assessed differences by Mann-Whitney |
| S4    | Rank correlation coefficients between clinical characteristics and top 10 genera                    | (1)binomial variables: 1 means "yes", 0 means "no", and were assigned as dummy variables and then explored the relationships directly through the      |

Supplementary Table S1: Detailed information of 69 inpatients with COVID-19

| Sample_id | Group        | Sample_type          | COVID-19_symptoms | Age (years) | BMI (kg/m <sup>2</sup> ) | Inpatient_days | Sex    | Cough | Diarrhea | Dyspnea | Coexisting_disorders (any) | Hypertension | Cardiopathy | ICU_admission | Death_during_hospitalization | SARS-CoV-2_IgG | SARS-CoV-2_IgM | White blood cell count (×10 <sup>9</sup> /L) | Neutrophil count (×10 <sup>9</sup> /L) | Lymphocyte count (×10 <sup>9</sup> /L) | Hemoglobin (g/L) | C-reactive protein (mg/L) | Procalcitonin (ng/ml) |
|-----------|--------------|----------------------|-------------------|-------------|--------------------------|----------------|--------|-------|----------|---------|----------------------------|--------------|-------------|---------------|------------------------------|----------------|----------------|----------------------------------------------|----------------------------------------|----------------------------------------|------------------|---------------------------|-----------------------|
| SN01      | Mild_group   | nasopharyngeal swabs | moderate          | 31          | 25.47                    | 6              | Male   | 1     | 0        | 0       | 0                          | 0            | 0           | 0             | 0                            | 190            | 32.1           | 6.7                                          | 3.85                                   | 2.15                                   | 140              | 2.3                       | 0.04                  |
| SN02      | Severe_group | sputum               | critical          | 57          | 24.77                    | 10             | Male   | 1     | 0        | 0       | 1                          | 1            | 1           | 0             | 0                            | 1.06           | 0.58           | 8.8                                          | 5.66                                   | 1.82                                   | 145              | 4.14                      | ...                   |
| SN03      | Mild_group   | sputum               | moderate          | 63          | 27.12                    | 12             | Female | 1     | 0        | 0       | 1                          | 1            | 0           | 0             | 0                            | 193            | 10.4           | 6                                            | 3.66                                   | 1.64                                   | 133              | 5.85                      | ...                   |
| SN04      | Mild_group   | nasopharyngeal swabs | moderate          | 73          | 24.14                    | 12             | Female | 1     | 0        | 0       | 1                          | 1            | 1           | 0             | 0                            | 187            | 4.99           | 5.5                                          | 3.38                                   | 1.61                                   | 88               | 0.57                      | ...                   |
| SN05      | Severe_group | nasopharyngeal swabs | severe            | 62          | 26.86                    | 40             | Male   | 1     | 0        | 1       | 1                          | 1            | 1           | 1             | 1                            | 39.3           | 2.25           | 10.6                                         | 9.31                                   | 0.85                                   | 133              | 117                       | 0.38                  |
| SN06      | Severe_group | nasopharyngeal swabs | severe            | 82          | 27.54                    | 36             | Male   | 1     | 1        | 0       | 1                          | 1            | 0           | 1             | 0                            | 186            | 63.9           | 10.6                                         | 9.11                                   | 0.67                                   | 154              | 61.7                      | 0.15                  |
| SN07      | Severe_group | nasopharyngeal swabs | severe            | 63          | 26.44                    | 61             | Female | 1     | 1        | 1       | 1                          | 1            | 0           | 1             | 0                            | 166            | 39.5           | 12.9                                         | 11.9                                   | 0.7                                    | 112              | 49.4                      | 2.42                  |
| SN08      | Mild_group   | nasopharyngeal swabs | moderate          | 54          | 24.65                    | 12             | Female | 1     | 0        | 0       | 1                          | 1            | 0           | 0             | 0                            | 173            | 62.2           | 4.8                                          | 3.38                                   | 1.01                                   | 109              | 8.65                      | 0.02                  |
| SN09      | Mild_group   | nasopharyngeal swabs | moderate          | 72          | 25.81                    | 9              | Female | 1     | 0        | 0       | 1                          | 1            | 0           | 0             | 0                            | 203            | 7.6            | 5.2                                          | 2.94                                   | 1.58                                   | 117              | 1.44                      | 0.02                  |
| SN10      | Mild_group   | nasopharyngeal swabs | moderate          | 57          | 38.05                    | 6              | Female | 1     | 0        | 0       | 1                          | 1            | 1           | 0             | 0                            | 2.05           | 2.02           | 6                                            | 4.14                                   | 1.43                                   | 132              | 2.54                      | 0.2                   |
| SN11      | Mild_group   | nasopharyngeal swabs | moderate          | 63          | 25.98                    | 21             | Male   | 0     | 1        | 0       | 1                          | 0            | 0           | 0             | 0                            | 105            | 153            | 6.3                                          | 4.09                                   | 1.53                                   | 126              | 1.99                      | ...                   |
| SN12      | Severe_group | nasopharyngeal swabs | severe            | 25          | 21.88                    | 28             | Male   | 1     | 0        | 0       | 0                          | 0            | 0           | 0             | 0                            | 63.5           | 30.1           | 6.3                                          | 4.47                                   | 1.08                                   | 134              | 39.7                      | 0.03                  |
| SN13      | Mild_group   | nasopharyngeal swabs | moderate          | 38          | 19.60                    | 7              | Female | 1     | 0        | 0       | 0                          | 0            | 0           | 0             | 0                            | 158            | 119            | 9.5                                          | 7.56                                   | 1.31                                   | 123              | 0.19                      | 0.01                  |
| SN14      | Severe_group | nasopharyngeal swabs | severe            | 85          | 16.86                    | 14             | Female | 1     | 0        | 0       | 1                          | 1            | 1           | 0             | 0                            | 179            | 54.8           | 3.1                                          | 1.94                                   | 0.73                                   | 86               | 15.2                      | 0.15                  |
| SN15      | Severe_group | nasopharyngeal swabs | severe            | 50          | 26.67                    | 17             | Female | 0     | 0        | 0       | 1                          | 1            | 0           | 0             | 0                            | 1.58           | 13.1           | 13.8                                         | 12.4                                   | 0.74                                   | 87               | 42.4                      | 0.24                  |
| SN16      | Mild_group   | nasopharyngeal swabs | moderate          | 42          | 26.44                    | 20             | Female | 1     | 1        | 1       | 1                          | 0            | 0           | 0             | 0                            | 121            | 12.8           | 8.3                                          | 5.59                                   | 2.15                                   | 110              | 5.29                      | 0.04                  |
| SN17      | Severe_group | nasopharyngeal swabs | severe            | 91          | 16.86                    | 22             | Female | 1     | 0        | 0       | 1                          | 1            | 1           | 0             | 0                            | 193            | 16.6           | 5.6                                          | 4.1                                    | 1.04                                   | 107              | 42                        | 0.04                  |
| SN18      | Severe_group | nasopharyngeal swabs | severe            | 69          | 24.86                    | 32             | Female | 1     | 1        | 0       | 1                          | 1            | 0           | 0             | 0                            | 2.11           | 1.11           | 16.7                                         | 13.2                                   | 2.54                                   | 93               | 58.9                      | 0.73                  |
| SN19      | Severe_group | nasopharyngeal swabs | severe            | 82          | 16.86                    | 10             | Female | 1     | 0        | 0       | 1                          | 1            | 1           | 0             | 0                            | 198            | 5.72           | 7.2                                          | 5.08                                   | 1.51                                   | 103              | 42.5                      | 0.12                  |
| SN20      | Mild_group   | nasopharyngeal swabs | moderate          | 81          | 15.82                    | 12             | Female | 1     | 0        | 0       | 1                          | 0            | 0           | 0             | 0                            | 5.65           | 2.41           | 4.7                                          | 2.41                                   | 1.79                                   | 101              | 4.04                      | 0.04                  |
| SN21      | Severe_group | nasopharyngeal swabs | severe            | 65          | 21.63                    | 20             | Female | 1     | 0        | 0       | 1                          | 1            | 0           | 0             | 0                            | 205            | 19.3           | 6.1                                          | 3.13                                   | 2.02                                   | 139              | 4.4                       | 0.07                  |
| SN22      | Mild_group   | nasopharyngeal swabs | moderate          | 49          | 27.55                    | 23             | Male   | 1     | 1        | 1       | 1                          | 0            | 0           | 0             | 0                            | 138            | 84.7           | 4.4                                          | 2.46                                   | 1.5                                    | 128              | 4.41                      | 0.03                  |
| SN23      | Mild_group   | nasopharyngeal swabs | moderate          | 51          | 15.63                    | 7              | Female | 1     | 0        | 0       | 1                          | 0            | 0           | 0             | 0                            | 233            | 5.44           | 25.1                                         | 22.4                                   | 1.65                                   | 124              | 138                       | 0.45                  |
| SN24      | Mild_group   | nasopharyngeal swabs | moderate          | 62          | 25.64                    | 5              | Female | 1     | 0        | 0       | 0                          | 0            | 0           | 0             | 0                            | 248            | 27.4           | 5.6                                          | 3.23                                   | 1.98                                   | 122              | 1.01                      | 0.04                  |
| SN25      | Mild_group   | nasopharyngeal swabs | moderate          | 54          | 26.08                    | 17             | Male   | 0     | 0        | 0       | 1                          | 1            | 0           | 0             | 0                            | 172            | 20.8           | 5.9                                          | 3.23                                   | 1.95                                   | 139              | 1.17                      | ...                   |
| SN26      | Severe_group | nasopharyngeal swabs | severe            | 49          | 22.85                    | 16             | Female | 1     | 0        | 0       | 1                          | 0            | 0           | 0             | 0                            | 159            | 9.15           | 9.5                                          | 5.32                                   | 2.91                                   | 93               | 4.56                      | 0.04                  |

|      |             |                          |          |    |       |    |        |   |   |   |   |   |   |   |   |   |   |      |      |      |      |      |     |      |      |
|------|-------------|--------------------------|----------|----|-------|----|--------|---|---|---|---|---|---|---|---|---|---|------|------|------|------|------|-----|------|------|
| SN27 | Mild_group  | nasopharyn<br>geal swabs | moderate | 25 | 24.54 | 17 | Male   | 1 | 0 | 0 | 0 | 0 | 0 | 0 | 0 | 0 | 0 | 25.2 | 2.29 | 7.8  | 4.26 | 2.91 | 158 | 4.28 | 0.03 |
| SN28 | Mild_group  | sputum                   | moderate | 52 | 25.28 | 23 | Male   | 1 | 1 | 0 | 0 | 0 | 0 | 0 | 0 | 0 | 0 | 162  | 191  | 4.5  | 2.43 | 1.41 | 113 | 3.49 | 0.05 |
| SN29 | Mild_group  | sputum                   | moderate | 65 | 24.68 | 45 | Female | 1 | 1 | 0 | 1 | 1 | 0 | 0 | 0 | 0 | 0 | 196  | 9.51 | 5    | 3.42 | 0.9  | 121 | 2.95 | 0.03 |
| SN30 | Severe_grou | nasopharyn<br>geal swabs | severe   | 84 | 16.86 | 40 | Female | 1 | 0 | 1 | 1 | 1 | 0 | 1 | 1 | 0 | 0 | 226  | 54.9 | 8.9  | 8.15 | 0.48 | 105 | 78.4 | 0.61 |
| SN31 | Severe_grou | nasopharyn<br>geal swabs | critical | 69 | 23.63 | 16 | Female | 1 | 0 | 1 | 1 | 0 | 0 | 1 | 0 | 0 | 0 | 45   | 47.4 | 6.2  | 5.59 | 0.37 | 102 | 15.6 | 0.21 |
| SN32 | Mild_group  | nasopharyn<br>geal swabs | moderate | 66 | 21.11 | 17 | Female | 1 | 0 | 0 | 1 | 1 | 0 | 0 | 0 | 0 | 0 | 62.6 | 99.3 | 4.3  | 2.5  | 1.22 | 116 | 34.9 | 11.7 |
| SN33 | Mild_group  | nasopharyn<br>geal swabs | moderate | 67 | 20.96 | 5  | Female | 0 | 0 | 0 | 1 | 0 | 0 | 0 | 0 | 0 | 0 | 207  | 26   | 6.3  | 4.15 | 1.56 | 123 | 8.75 | 0.01 |
| SN34 | Mild_group  | nasopharyn<br>geal swabs | moderate | 44 | 16.18 | 9  | Female | 0 | 0 | 0 | 1 | 0 | 0 | 0 | 0 | 0 | 0 | 4.69 | 1.77 | 5.2  | 4.31 | 0.41 | 77  | 197  | 0.36 |
| SN35 | Mild_group  | nasopharyn<br>geal swabs | moderate | 49 | 27.18 | 8  | Male   | 1 | 0 | 0 | 0 | 0 | 0 | 0 | 0 | 0 | 0 | 1.71 | 2.21 | 10.1 | 6.79 | 1.88 | 147 | 81   | 0.08 |
| SN36 | Mild_group  | nasopharyn<br>geal swabs | moderate | 95 | 16.86 | 7  | Female | 1 | 0 | 0 | 1 | 1 | 1 | 0 | 0 | 0 | 0 | 2.35 | 2.96 | 6.4  | 4.3  | 1.32 | 72  | 9.94 | 0.73 |
| SN37 | Mild_group  | nasopharyn<br>geal swabs | moderate | 52 | 25.47 | 6  | Male   | 0 | 0 | 0 | 0 | 0 | 0 | 0 | 0 | 0 | 0 | 0.73 | 2.76 | 5.4  | 3.9  | 1.11 | 100 | 10.9 | 0.29 |
| SN38 | Mild_group  | nasopharyn<br>geal swabs | moderate | 72 | 19.73 | 4  | Female | 1 | 0 | 0 | 1 | 1 | 0 | 0 | 0 | 0 | 0 | 56.8 | 22.4 | 5.8  | 4.38 | 0.94 | 87  | 6.28 | ...  |
| SN39 | Mild_group  | sputum                   | moderate | 47 | 23.73 | 12 | Female | 1 | 0 | 0 | 0 | 0 | 0 | 0 | 0 | 0 | 0 | 174  | 122  | 6.6  | 3.83 | 1.98 | 60  | 0.27 | 0.03 |
| SN40 | Severe_grou | nasopharyn<br>geal swabs | severe   | 66 | 27.54 | 10 | Male   | 1 | 0 | 1 | 1 | 1 | 0 | 1 | 0 | 0 | 0 | 60.9 | 4.93 | 6.8  | 5.72 | 0.51 | 133 | 30.1 | 0.23 |
| SN41 | Mild_group  | nasopharyn<br>geal swabs | moderate | 80 | 35.43 | 5  | Male   | 1 | 0 | 0 | 1 | 1 | 1 | 0 | 0 | 0 | 0 | 59.8 | 34.8 | 6.5  | 3    | 2.57 | 117 | 1.69 | 0.04 |
| SN42 | Severe_grou | nasopharyn<br>geal swabs | severe   | 85 | 27.54 | 12 | Male   | 0 | 0 | 0 | 1 | 0 | 0 | 0 | 0 | 0 | 0 | 189  | 28.7 | 4.3  | 2.42 | 1.24 | 70  | 28.8 | 0.13 |
| SN43 | Severe_grou | nasopharyn<br>geal swabs | severe   | 77 | 27.54 | 5  | Male   | 1 | 0 | 0 | 1 | 0 | 0 | 0 | 0 | 0 | 0 | 160  | 10.9 | 7.5  | 6.3  | 0.89 | 88  | 53.5 | 1.23 |
| SN44 | Mild_group  | nasopharyn<br>geal swabs | moderate | 50 | 27.55 | 7  | Male   | 1 | 0 | 0 | 1 | 1 | 0 | 0 | 0 | 0 | 0 | 188  | 85.2 | 9.1  | 4.58 | 3.77 | 143 | 3.47 | 0.14 |
| SN45 | Mild_group  | nasopharyn<br>geal swabs | moderate | 70 | 27.73 | 14 | Female | 1 | 1 | 0 | 1 | 1 | 0 | 0 | 0 | 0 | 0 | 51   | 9.81 | 5.6  | 3.29 | 1.52 | 133 | 4.59 | 0.06 |
| SN46 | Mild_group  | nasopharyn<br>geal swabs | moderate | 65 | 20.81 | 10 | Female | 1 | 0 | 0 | 1 | 0 | 0 | 0 | 0 | 0 | 0 | 71.4 | 16.3 | 6.6  | 3.86 | 2.04 | 135 | 3.72 | 0.03 |
| SN47 | Severe_grou | nasopharyn<br>geal swabs | severe   | 36 | 17.92 | 9  | Male   | 1 | 0 | 0 | 1 | 0 | 0 | 0 | 0 | 0 | 0 | 53.8 | 0.57 | 6.1  | 5    | 0.39 | 114 | 61.6 | 0.09 |
| SN48 | Mild_group  | nasopharyn<br>geal swabs | moderate | 57 | 25.90 | 4  | Female | 1 | 0 | 0 | 1 | 1 | 0 | 1 | 1 | 0 | 0 | 88.2 | 4.39 | 9    | 8.09 | 0.67 | 42  | 8.36 | 0.16 |
| SN49 | Severe_grou | nasopharyn<br>geal swabs | severe   | 83 | 20.28 | 30 | Male   | 1 | 0 | 0 | 1 | 0 | 0 | 1 | 0 | 0 | 0 | 199  | 37.5 | 7.6  | 6.43 | 0.52 | 83  | 77.2 | 0.46 |
| SN50 | Severe_grou | nasopharyn<br>geal swabs | critical | 87 | 13.21 | 28 | Male   | 1 | 0 | 1 | 1 | 0 | 0 | 1 | 1 | 0 | 0 | 201  | 30.2 | 8.4  | 7.4  | 0.56 | 122 | 52   | 0.69 |
| SN51 | Mild_group  | nasopharyn<br>geal swabs | moderate | 86 | 16.86 | 6  | Female | 0 | 0 | 0 | 1 | 0 | 1 | 0 | 0 | 0 | 0 | 98.7 | 2.71 | 8.1  | 5.97 | 1.23 | 88  | 1.48 | ...  |
| SN52 | Mild_group  | nasopharyn<br>geal swabs | moderate | 40 | 16.94 | 17 | Female | 0 | 1 | 0 | 0 | 0 | 0 | 0 | 0 | 0 | 0 | 171  | 18.8 | 5.4  | 2.98 | 1.89 | 111 | 0.28 | 0.04 |
| SN53 | Mild_group  | nasopharyn<br>geal swabs | moderate | 66 | 25.78 | 53 | Male   | 1 | 0 | 0 | 0 | 0 | 0 | 0 | 0 | 0 | 0 | 177  | 32.2 | 5.1  | 2.29 | 2.22 | 114 | 2.09 | 0.06 |
| SN54 | Mild_group  | nasopharyn<br>geal swabs | moderate | 36 | 18.03 | 12 | Female | 1 | 0 | 0 | 0 | 0 | 0 | 0 | 0 | 0 | 0 | 69.4 | 3.09 | 3.7  | 1.51 | 1.66 | 108 | 0.27 | 0.01 |
| SN55 | Mild_group  | nasopharyn<br>geal swabs | moderate | 85 | 25.39 | 9  | Female | 0 | 0 | 0 | 1 | 1 | 1 | 0 | 0 | 0 | 0 | 2.21 | 0.8  | 8.3  | 6.53 | 1.18 | 162 | 95.1 | ...  |
| SN56 | Severe_grou | nasopharyn<br>geal swabs | severe   | 80 | 21.09 | 15 | Male   | 1 | 0 | 1 | 1 | 0 | 1 | 0 | 0 | 0 | 0 | 84.9 | 43.6 | 16   | 11.1 | 3.45 | 149 | 11   | 0.06 |
| SN57 | Severe_grou | nasopharyn<br>geal swabs | severe   | 56 | 24.45 | 5  | Female | 1 | 0 | 0 | 0 | 0 | 0 | 0 | 0 | 0 | 0 | 92   | 19.7 | 4    | 1.89 | 1.65 | 111 | 0.86 | 0.02 |

|      |              |                      |          |     |       |    |        |   |   |   |   |   |   |   |   |      |      |      |      |      |     |      |      |
|------|--------------|----------------------|----------|-----|-------|----|--------|---|---|---|---|---|---|---|---|------|------|------|------|------|-----|------|------|
| SN58 | Severe_group | nasopharyngeal swabs | severe   | 73  | 24.91 | 6  | Male   | 1 | 0 | 0 | 1 | 0 | 0 | 0 | 0 | 52.7 | 3.35 | 6.9  | 2.75 | 2.77 | 114 | 13.7 | 0.06 |
| SN59 | Mild_group   | nasopharyngeal swabs | moderate | 57  | 24.97 | 6  | Female | 1 | 0 | 0 | 1 | 1 | 0 | 0 | 0 | 60.2 | 14.5 | 6    | 3.65 | 1.61 | 108 | 14.5 | 0.01 |
| SN60 | Mild_group   | nasopharyngeal swabs | moderate | 71  | 24.61 | 45 | Male   | 1 | 0 | 0 | 1 | 0 | 1 | 0 | 0 | 113  | 21.6 | 8.5  | 6.02 | 1.36 | 136 | 9.32 | 0.04 |
| SN61 | Severe_group | nasopharyngeal swabs | severe   | 86  | 27.54 | 6  | Male   | 0 | 0 | 0 | 1 | 1 | 1 | 0 | 0 | 76.7 | 6.92 | 12.9 | 8.81 | 3.2  | 87  | 39   | 0.22 |
| SN62 | Mild_group   | nasopharyngeal swabs | moderate | 51  | 26.20 | 21 | Male   | 0 | 0 | 0 | 1 | 1 | 0 | 0 | 0 | 115  | 23.1 | 5.2  | 3.15 | 1.46 | 157 | 0.99 | 0.04 |
| SN63 | Severe_group | nasopharyngeal swabs | severe   | 63  | 21.23 | 47 | Female | 1 | 0 | 1 | 1 | 1 | 0 | 0 | 0 | 114  | 25.2 | 6.1  | 4.88 | 0.86 | 111 | 79.6 | 0.06 |
| SN64 | Severe_group | nasopharyngeal swabs | severe   | 75  | 27.54 | 39 | Male   | 1 | 0 | 1 | 1 | 1 | 1 | 0 | 0 | 78   | 5.98 | 8.6  | 7.63 | 0.28 | 136 | 87.6 | 0.22 |
| SN65 | Mild_group   | nasopharyngeal swabs | moderate | 100 | 13.52 | 12 | Male   | 0 | 0 | 1 | 1 | 1 | 0 | 0 | 0 | 193  | 5.37 | 6.7  | 4.79 | 1.19 | 83  | 10   | 0.2  |
| SN66 | Mild_group   | nasopharyngeal swabs | moderate | 58  | 25.90 | 49 | Female | 1 | 0 | 1 | 1 | 1 | 0 | 1 | 1 | 171  | 22   | 9.8  | 8.37 | 1.03 | 94  | 182  | 0.32 |
| SN67 | Mild_group   | nasopharyngeal swabs | moderate | 54  | 21.78 | 12 | Female | 1 | 0 | 0 | 1 | 1 | 0 | 0 | 0 | 199  | 146  | 4.9  | 2.76 | 1.73 | 126 | 1.03 | 0.05 |
| SN68 | Severe_group | nasopharyngeal swabs | severe   | 73  | 27.34 | 61 | Male   | 1 | 1 | 1 | 1 | 1 | 0 | 0 | 0 | 82.4 | 13   | 6.4  | 5.36 | 0.5  | 117 | 86.5 | 0.12 |
| SN69 | Severe_group | nasopharyngeal swabs | severe   | 67  | 22.49 | 52 | Male   | 1 | 0 | 1 | 1 | 1 | 0 | 1 | 0 | 150  | 98.2 | 10.6 | 8.51 | 1.1  | 167 | 118  | 0.1  |

Supplementary Table S2: Relative abundance of bacterial microbiome among each samples at different levels

| S2.1 At the phylum level |                       |                      |                                    |                      |                   |                     |          |                       |                     |                      |                    |
|--------------------------|-----------------------|----------------------|------------------------------------|----------------------|-------------------|---------------------|----------|-----------------------|---------------------|----------------------|--------------------|
|                          | <i>Actinobacteria</i> | <i>Bacteroidetes</i> | <i>Candidatus Saccharibacteria</i> | <i>Cyanobacteria</i> | <i>Firmicutes</i> | <i>Fusobacteria</i> | Others   | <i>Proteobacteria</i> | <i>Spirochaetes</i> | <i>Synergistetes</i> | <i>Tenericutes</i> |
| SN01                     | 4.29E-02              | 2.60E-01             | 7.62E-03                           | 0.00E+00             | 0.430395646       | 7.78E-02            | 5.44E-04 | 0.152522504           | 2.69E-02            | 1.05E-03             | 0.00E+00           |
| SN02                     | 1.04E-01              | 2.14E-01             | 0.00E+00                           | 0.00E+00             | 0.658697928       | 0.00E+00            | 0.00E+00 | 0.023738748           | 0.00E+00            | 0.00E+00             | 0.00E+00           |
| SN03                     | 7.03E-02              | 1.01E-01             | 2.09E-05                           | 0.00E+00             | 0.379129161       | 2.91E-03            | 0.00E+00 | 0.441657944           | 5.19E-03            | 1.67E-04             | 0.00E+00           |
| SN04                     | 3.90E-01              | 5.79E-02             | 4.19E-05                           | 6.28E-05             | 0.481494662       | 2.72E-02            | 0.00E+00 | 0.042913963           | 3.14E-04            | 4.40E-04             | 0.00E+00           |
| SN05                     | 0.00E+00              | 1.53E-03             | 0.00E+00                           | 0.00E+00             | 0.002846975       | 0.00E+00            | 0.00E+00 | 0.995624869           | 0.00E+00            | 0.00E+00             | 0.00E+00           |
| SN06                     | 2.09E-02              | 1.76E-02             | 8.16E-04                           | 0.00E+00             | 0.041323006       | 2.76E-03            | 0.00E+00 | 0.915846766           | 3.14E-04            | 1.26E-04             | 2.30E-04           |
| SN07                     | 1.95E-01              | 1.12E-01             | 0.00E+00                           | 0.00E+00             | 0.48275068        | 2.93E-04            | 0.00E+00 | 0.209692276           | 0.00E+00            | 0.00E+00             | 0.00E+00           |
| SN08                     | 4.11E-01              | 9.70E-02             | 3.18E-03                           | 8.37E-05             | 0.423278208       | 2.92E-02            | 5.65E-04 | 0.03047938            | 4.81E-03            | 0.00E+00             | 0.00E+00           |
| SN09                     | 2.31E-01              | 1.00E-01             | 9.84E-04                           | 0.00E+00             | 0.585576722       | 4.23E-03            | 0.00E+00 | 0.077203266           | 6.28E-04            | 0.00E+00             | 4.19E-05           |
| SN10                     | 1.28E-01              | 4.16E-02             | 4.19E-04                           | 1.67E-04             | 0.598283442       | 8.56E-02            | 3.56E-04 | 0.139292443           | 1.76E-03            | 1.67E-04             | 4.14E-03           |
| SN11                     | 9.88E-01              | 1.34E-03             | 4.19E-04                           | 0.00E+00             | 0.006175424       | 2.93E-04            | 7.33E-04 | 0.002784174           | 0.00E+00            | 0.00E+00             | 0.00E+00           |
| SN12                     | 1.44E-02              | 4.88E-03             | 4.19E-05                           | 2.07E-03             | 0.952459703       | 2.32E-03            | 1.47E-04 | 0.023675947           | 0.00E+00            | 0.00E+00             | 2.09E-05           |
| SN13                     | 7.73E-02              | 1.42E-01             | 2.99E-03                           | 0.00E+00             | 0.433096085       | 6.04E-02            | 1.05E-04 | 0.281243458           | 2.18E-03            | 2.09E-04             | 4.19E-05           |
| SN14                     | 6.77E-02              | 1.88E-04             | 6.28E-05                           | 2.93E-04             | 0.865040821       | 2.09E-05            | 4.19E-05 | 0.066631777           | 0.00E+00            | 0.00E+00             | 0.00E+00           |
| SN15                     | 5.16E-02              | 5.98E-02             | 1.87E-02                           | 5.23E-04             | 0.139627381       | 4.81E-04            | 0.00E+00 | 0.729286163           | 0.00E+00            | 0.00E+00             | 0.00E+00           |
| SN16                     | 2.01E-01              | 4.55E-01             | 3.52E-03                           | 0.00E+00             | 0.274544693       | 2.87E-02            | 3.98E-04 | 0.022985137           | 6.11E-03            | 7.54E-03             | 1.88E-04           |
| SN17                     | 8.34E-01              | 3.98E-02             | 1.90E-03                           | 0.00E+00             | 0.116935315       | 4.84E-03            | 6.28E-05 | 0.00247017            | 0.00E+00            | 8.37E-05             | 0.00E+00           |
| SN18                     | 9.78E-01              | 1.76E-03             | 4.61E-04                           | 3.77E-04             | 0.00247017        | 2.30E-04            | 7.33E-03 | 0.008666527           | 0.00E+00            | 3.56E-04             | 0.00E+00           |
| SN19                     | 4.24E-02              | 4.16E-02             | 0.00E+00                           | 0.00E+00             | 0.813313795       | 5.37E-02            | 0.00E+00 | 0.044839858           | 0.00E+00            | 0.00E+00             | 4.19E-03           |
| SN20                     | 1.09E-01              | 1.31E-01             | 0.00E+00                           | 8.37E-05             | 0.719426418       | 0.00E+00            | 0.00E+00 | 0.039920452           | 0.00E+00            | 0.00E+00             | 0.00E+00           |
| SN21                     | 2.05E-01              | 3.73E-01             | 4.23E-03                           | 0.00E+00             | 0.402784174       | 4.96E-03            | 1.88E-04 | 0.00931547            | 3.14E-04            | 4.19E-05             | 4.19E-05           |
| SN22                     | 3.06E-01              | 5.99E-02             | 1.53E-02                           | 0.00E+00             | 0.559388738       | 2.01E-02            | 2.09E-05 | 0.034854511           | 3.37E-03            | 1.13E-03             | 0.00E+00           |
| SN23                     | 7.97E-01              | 1.15E-01             | 1.74E-03                           | 0.00E+00             | 0.083567092       | 1.38E-03            | 4.19E-05 | 0.001235085           | 2.09E-05            | 3.56E-04             | 0.00E+00           |
| SN24                     | 7.66E-03              | 4.27E-03             | 2.09E-04                           | 2.30E-04             | 0.979485032       | 1.88E-04            | 6.28E-05 | 0.007808248           | 8.37E-05            | 0.00E+00             | 0.00E+00           |
| SN25                     | 3.40E-01              | 3.03E-01             | 5.11E-03                           | 0.00E+00             | 0.324848231       | 1.94E-02            | 4.19E-05 | 0.006447561           | 1.26E-03            | 6.28E-05             | 2.09E-05           |
| SN26                     | 5.84E-01              | 1.26E-04             | 0.00E+00                           | 9.63E-04             | 0.391542809       | 4.19E-04            | 0.00E+00 | 0.022922336           | 0.00E+00            | 0.00E+00             | 0.00E+00           |
| SN27                     | 2.35E-01              | 7.81E-02             | 2.91E-03                           | 0.00E+00             | 0.664329077       | 6.49E-03            | 8.37E-05 | 0.008226921           | 3.04E-03            | 1.80E-03             | 8.37E-05           |
| SN28                     | 4.03E-01              | 1.49E-01             | 2.45E-03                           | 2.97E-03             | 0.226669458       | 2.03E-02            | 3.77E-04 | 0.188046891           | 6.87E-03            | 1.88E-04             | 0.00E+00           |
| SN29                     | 3.67E-01              | 3.12E-01             | 1.99E-03                           | 8.37E-04             | 0.27452376        | 2.90E-02            | 2.09E-04 | 0.011241365           | 3.22E-03            | 9.00E-04             | 0.00E+00           |
| SN30                     | 1.49E-01              | 9.38E-03             | 4.19E-05                           | 0.00E+00             | 0.010676157       | 0.00E+00            | 0.00E+00 | 0.828092945           | 0.00E+00            | 1.05E-04             | 2.53E-03           |
| SN31                     | 3.10E-02              | 7.13E-01             | 0.00E+00                           | 0.00E+00             | 0.004563534       | 2.09E-04            | 0.00E+00 | 0.251015282           | 0.00E+00            | 0.00E+00             | 8.37E-05           |
| SN32                     | 5.75E-01              | 6.82E-02             | 2.32E-03                           | 2.09E-05             | 0.143290768       | 7.66E-02            | 5.44E-04 | 0.133786896           | 4.40E-04            | 2.09E-05             | 0.00E+00           |
| SN33                     | 1.88E-01              | 8.34E-02             | 4.19E-05                           | 0.00E+00             | 0.324387691       | 1.27E-01            | 4.19E-05 | 0.267238853           | 9.27E-03            | 2.09E-05             | 0.00E+00           |
| SN34                     | 1.02E-01              | 1.62E-01             | 0.00E+00                           | 0.00E+00             | 0.69476659        | 4.19E-05            | 0.00E+00 | 0.041511409           | 0.00E+00            | 0.00E+00             | 0.00E+00           |
| SN35                     | 2.64E-01              | 2.18E-01             | 4.88E-03                           | 0.00E+00             | 0.464161608       | 4.00E-02            | 2.09E-05 | 0.005296211           | 2.62E-03            | 6.49E-04             | 2.09E-05           |
| SN36                     | 1.16E-01              | 2.68E-02             | 5.02E-04                           | 0.00E+00             | 0.8522713         | 3.71E-03            | 0.00E+00 | 0.000942014           | 4.19E-05            | 1.05E-04             | 0.00E+00           |
| SN37                     | 1.12E-01              | 3.88E-01             | 2.33E-02                           | 0.00E+00             | 0.351727025       | 1.11E-01            | 6.91E-04 | 0.013460331           | 9.21E-04            | 6.28E-05             | 0.00E+00           |
| SN38                     | 2.77E-02              | 4.61E-04             | 1.67E-04                           | 1.63E-03             | 0.956499895       | 2.09E-05            | 1.05E-04 | 0.013250994           | 0.00E+00            | 8.37E-05             | 4.19E-05           |
| SN39                     | 1.27E-01              | 1.87E-01             | 1.38E-03                           | 4.19E-05             | 0.43225874        | 7.32E-02            | 0.00E+00 | 0.164622148           | 2.01E-03            | 1.24E-02             | 1.05E-04           |
| SN40                     | 3.33E-03              | 1.42E-03             | 0.00E+00                           | 0.00E+00             | 0.044400251       | 1.17E-03            | 0.00E+00 | 0.949675529           | 0.00E+00            | 0.00E+00             | 0.00E+00           |
| SN41                     | 1.16E-01              | 9.63E-02             | 4.65E-03                           | 0.00E+00             | 0.684592841       | 2.43E-02            | 1.88E-04 | 0.061544903           | 6.91E-03            | 4.90E-03             | 5.86E-04           |
| SN42                     | 4.33E-01              | 2.68E-03             | 0.00E+00                           | 0.00E+00             | 0.557211639       | 0.00E+00            | 0.00E+00 | 0.0068453             | 4.19E-05            | 0.00E+00             | 0.00E+00           |
| SN43                     | 8.24E-01              | 2.19E-02             | 1.67E-04                           | 0.00E+00             | 0.122147792       | 2.51E-04            | 0.00E+00 | 0.03110739            | 6.28E-05            | 0.00E+00             | 0.00E+00           |
| SN44                     | 6.09E-01              | 8.80E-02             | 1.17E-02                           | 2.09E-05             | 0.256562696       | 1.14E-02            | 2.09E-05 | 0.023068872           | 1.47E-04            | 6.28E-05             | 0.00E+00           |
| SN45                     | 1.89E-01              | 1.76E-01             | 0.00E+00                           | 0.00E+00             | 0.545635336       | 2.47E-02            | 4.19E-05 | 0.062235713           | 7.12E-04            | 1.21E-03             | 1.88E-04           |
| SN46                     | 1.99E-01              | 4.66E-02             | 6.49E-04                           | 6.28E-05             | 0.686267532       | 4.04E-02            | 0.00E+00 | 0.024303957           | 2.49E-03            | 0.00E+00             | 0.00E+00           |
| SN47                     | 8.28E-02              | 2.47E-01             | 0.00E+00                           | 0.00E+00             | 0.628155746       | 2.57E-02            | 0.00E+00 | 0.015993301           | 0.00E+00            | 0.00E+00             | 0.00E+00           |
| SN48                     | 6.09E-03              | 1.01E-01             | 0.00E+00                           | 4.19E-05             | 0.891584677       | 0.00E+00            | 5.23E-04 | 0.000544275           | 0.00E+00            | 0.00E+00             | 0.00E+00           |
| SN49                     | 7.51E-01              | 1.26E-04             | 1.05E-04                           | 0.00E+00             | 0.247896169       | 2.09E-05            | 0.00E+00 | 0.000167469           | 0.00E+00            | 1.47E-04             | 9.21E-04           |

|      |          |          |          |          |             |          |          |             |          |          |          |
|------|----------|----------|----------|----------|-------------|----------|----------|-------------|----------|----------|----------|
| SN50 | 2.05E-03 | 0.00E+00 | 0.00E+00 | 0.00E+00 | 0.645509734 | 0.00E+00 | 0.00E+00 | 0.352438769 | 0.00E+00 | 0.00E+00 | 0.00E+00 |
| SN51 | 3.94E-02 | 9.86E-02 | 0.00E+00 | 2.09E-05 | 0.857944317 | 2.09E-05 | 0.00E+00 | 0.003788989 | 2.30E-04 | 0.00E+00 | 0.00E+00 |
| SN52 | 1.98E-01 | 3.96E-01 | 1.65E-02 | 3.35E-04 | 0.300167469 | 6.98E-02 | 6.28E-04 | 0.015176889 | 3.31E-03 | 5.86E-04 | 6.28E-05 |
| SN53 | 3.40E-01 | 3.62E-01 | 1.09E-02 | 4.19E-05 | 0.243123299 | 2.79E-02 | 2.09E-05 | 0.015742098 | 6.28E-05 | 0.00E+00 | 0.00E+00 |
| SN54 | 4.13E-01 | 2.21E-01 | 6.13E-03 | 4.19E-05 | 0.308080385 | 4.18E-02 | 0.00E+00 | 0.009629475 | 1.88E-04 | 2.09E-05 | 0.00E+00 |
| SN55 | 4.19E-05 | 1.26E-04 | 0.00E+00 | 4.19E-05 | 0.99907892  | 0.00E+00 | 0.00E+00 | 0.000711744 | 0.00E+00 | 0.00E+00 | 0.00E+00 |
| SN56 | 7.58E-03 | 1.47E-04 | 0.00E+00 | 8.37E-05 | 0.991207871 | 0.00E+00 | 0.00E+00 | 0.000711744 | 0.00E+00 | 0.00E+00 | 2.72E-04 |
| SN57 | 4.35E-01 | 2.81E-01 | 1.86E-02 | 4.19E-05 | 0.240694997 | 8.23E-03 | 0.00E+00 | 0.016767846 | 0.00E+00 | 0.00E+00 | 0.00E+00 |
| SN58 | 4.44E-01 | 8.79E-04 | 0.00E+00 | 4.19E-05 | 0.288758635 | 6.28E-05 | 2.09E-05 | 0.266485242 | 0.00E+00 | 0.00E+00 | 0.00E+00 |
| SN59 | 2.69E-01 | 3.47E-01 | 4.40E-04 | 2.09E-05 | 0.322336194 | 1.56E-02 | 0.00E+00 | 0.044442119 | 5.02E-04 | 1.05E-04 | 2.09E-05 |
| SN60 | 6.56E-01 | 6.28E-05 | 0.00E+00 | 1.49E-03 | 0.002951643 | 0.00E+00 | 0.00E+00 | 0.339020306 | 0.00E+00 | 0.00E+00 | 0.00E+00 |
| SN61 | 7.18E-01 | 1.67E-04 | 0.00E+00 | 0.00E+00 | 0.279401298 | 4.19E-05 | 0.00E+00 | 0.002135231 | 2.09E-05 | 1.88E-04 | 0.00E+00 |
| SN62 | 1.19E-01 | 1.52E-01 | 1.91E-02 | 2.47E-03 | 0.490140255 | 4.10E-03 | 0.00E+00 | 0.2067825   | 6.57E-03 | 0.00E+00 | 6.28E-05 |
| SN63 | 7.81E-01 | 1.17E-02 | 1.15E-03 | 1.04E-02 | 0.037157212 | 3.77E-04 | 6.28E-05 | 0.158509525 | 0.00E+00 | 0.00E+00 | 0.00E+00 |
| SN64 | 9.31E-01 | 4.17E-03 | 8.37E-05 | 2.24E-03 | 0.044211848 | 2.09E-05 | 0.00E+00 | 0.018589073 | 0.00E+00 | 0.00E+00 | 0.00E+00 |
| SN65 | 9.64E-01 | 2.18E-03 | 0.00E+00 | 1.26E-04 | 0.014297676 | 4.19E-05 | 8.37E-05 | 0.019258949 | 0.00E+00 | 0.00E+00 | 0.00E+00 |
| SN66 | 1.97E-03 | 0.00E+00 | 0.00E+00 | 0.00E+00 | 0.000502407 | 0.00E+00 | 0.00E+00 | 0.99752983  | 0.00E+00 | 0.00E+00 | 0.00E+00 |
| SN67 | 8.57E-01 | 2.30E-03 | 1.05E-04 | 4.19E-05 | 0.09338497  | 0.00E+00 | 2.09E-05 | 0.045760938 | 1.05E-04 | 1.00E-03 | 0.00E+00 |
| SN68 | 2.20E-02 | 1.19E-01 | 9.44E-03 | 1.05E-04 | 0.344630521 | 1.28E-03 | 1.88E-03 | 0.50207243  | 0.00E+00 | 0.00E+00 | 0.00E+00 |
| SN69 | 4.04E-01 | 1.01E-02 | 2.72E-04 | 2.09E-05 | 0.286581537 | 3.35E-04 | 6.28E-05 | 0.299037053 | 0.00E+00 | 0.00E+00 | 4.19E-05 |

| S2.2 At the class level |                  |                |                    |                    |                   |                   |                    |                     |                 |                     |            |
|-------------------------|------------------|----------------|--------------------|--------------------|-------------------|-------------------|--------------------|---------------------|-----------------|---------------------|------------|
|                         | <i>Actinobac</i> | <i>Bacilli</i> | <i>Bacteroidia</i> | <i>Betaproteob</i> | <i>Clostridia</i> | <i>Epsilonpro</i> | <i>Flavobacter</i> | <i>Fusobacteria</i> | <i>Gammapro</i> | <i>Negativicute</i> | Others     |
| SN01                    | 4.29E-02         | 0.30157        | 2.57E-01           | 1.17E-01           | 7.69E-02          | 4.06E-03          | 3.04E-03           | 7.78E-02            | 2.97E-02        | 4.99E-02            | 0.04067406 |
| SN02                    | 1.04E-01         | 0.352878       | 2.14E-01           | 1.43E-02           | 0.00E+00          | 6.91E-04          | 0.00E+00           | 0.00E+00            | 8.77E-03        | 3.06E-01            | 0          |
| SN03                    | 7.03E-02         | 0.103496       | 1.00E-01           | 1.26E-04           | 3.70E-02          | 4.81E-04          | 2.09E-04           | 2.91E-03            | 4.41E-01        | 2.31E-01            | 0.01268579 |
| SN04                    | 3.90E-01         | 0.42175        | 4.01E-02           | 4.03E-02           | 1.68E-02          | 2.24E-03          | 1.78E-02           | 2.72E-02            | 3.35E-04        | 3.84E-02            | 0.00550555 |
| SN05                    | 0.00E+00         | 0.002805       | 1.53E-03           | 0.00E+00           | 0.00E+00          | 0.00E+00          | 0.00E+00           | 0.00E+00            | 9.96E-01        | 4.19E-05            | 0          |
| SN06                    | 2.09E-02         | 0.012728       | 1.76E-02           | 4.40E-04           | 7.31E-03          | 8.21E-03          | 0.00E+00           | 2.76E-03            | 9.07E-01        | 2.08E-02            | 0.00194683 |
| SN07                    | 1.95E-01         | 0.332615       | 1.11E-01           | 2.03E-01           | 5.40E-03          | 4.73E-03          | 1.21E-03           | 2.93E-04            | 2.26E-03        | 1.43E-01            | 0.00127695 |
| SN08                    | 4.11E-01         | 0.239983       | 9.14E-02           | 9.80E-03           | 5.05E-02          | 1.19E-02          | 4.38E-03           | 2.92E-02            | 4.98E-03        | 1.33E-01            | 0.01377434 |
| SN09                    | 2.31E-01         | 0.414549       | 9.13E-02           | 3.05E-02           | 4.68E-02          | 1.55E-03          | 9.15E-03           | 4.23E-03            | 4.51E-02        | 1.24E-01            | 0.00236655 |
| SN10                    | 1.28E-01         | 0.542935       | 2.66E-03           | 2.78E-02           | 3.76E-02          | 1.01E-01          | 3.84E-02           | 8.56E-02            | 7.72E-03        | 1.66E-02            | 0.01128323 |
| SN11                    | 9.88E-01         | 0.004291       | 8.37E-04           | 1.00E-03           | 1.65E-03          | 2.09E-05          | 0.00E+00           | 2.93E-04            | 2.09E-04        | 2.30E-04            | 0.00320285 |
| SN12                    | 1.44E-02         | 0.947101       | 2.68E-03           | 1.22E-02           | 2.70E-03          | 1.47E-04          | 1.44E-03           | 2.32E-03            | 3.91E-03        | 2.66E-03            | 0.01040402 |
| SN13                    | 7.73E-02         | 0.302512       | 1.29E-01           | 2.03E-01           | 2.62E-02          | 7.79E-03          | 1.31E-02           | 6.04E-02            | 7.00E-02        | 1.03E-01            | 0.00755704 |
| SN14                    | 6.77E-02         | 0.864873       | 6.28E-05           | 7.95E-04           | 8.37E-05          | 0.00E+00          | 2.09E-05           | 2.09E-05            | 6.46E-02        | 8.37E-05            | 0.00171656 |
| SN15                    | 5.16E-02         | 0.035231       | 5.34E-02           | 2.14E-02           | 1.11E-02          | 1.35E-02          | 4.00E-03           | 4.81E-04            | 6.93E-01        | 9.15E-02            | 0.02459703 |
| SN16                    | 2.01E-01         | 0.15717        | 4.49E-01           | 9.92E-03           | 4.16E-02          | 2.30E-03          | 3.50E-03           | 2.87E-02            | 1.06E-02        | 7.34E-02            | 0.02237806 |
| SN17                    | 8.34E-01         | 0.007515       | 3.92E-02           | 6.28E-05           | 5.20E-02          | 2.30E-03          | 5.23E-04           | 4.84E-03            | 8.37E-05        | 5.50E-02            | 0.00450073 |
| SN18                    | 9.78E-01         | 0.001612       | 5.02E-04           | 3.71E-03           | 7.95E-04          | 8.37E-05          | 1.05E-04           | 2.30E-04            | 1.47E-03        | 6.28E-05            | 0.01308353 |
| SN19                    | 4.24E-02         | 0.735336       | 3.63E-02           | 1.90E-02           | 1.92E-02          | 2.57E-02          | 5.30E-03           | 5.37E-02            | 8.37E-05        | 5.88E-02            | 0.00418673 |
| SN20                    | 1.09E-01         | 0.010927       | 1.31E-01           | 2.45E-02           | 1.05E-04          | 1.54E-02          | 0.00E+00           | 0.00E+00            | 2.09E-05        | 7.08E-01            | 0.00010467 |
| SN21                    | 2.05E-01         | 0.198639       | 3.73E-01           | 1.40E-03           | 2.45E-02          | 4.81E-03          | 8.37E-05           | 4.96E-03            | 3.10E-03        | 1.76E-01            | 0.0087712  |
| SN22                    | 3.06E-01         | 0.398242       | 5.56E-02           | 2.08E-02           | 5.45E-02          | 5.65E-03          | 4.33E-03           | 2.01E-02            | 8.37E-03        | 1.02E-01            | 0.02499477 |
| SN23                    | 7.97E-01         | 0.01233        | 1.14E-01           | 2.30E-04           | 2.20E-02          | 9.42E-04          | 2.51E-04           | 1.38E-03            | 6.28E-05        | 4.53E-02            | 0.00609169 |
| SN24                    | 7.66E-03         | 0.9583         | 3.58E-03           | 3.04E-03           | 1.97E-02          | 0.00E+00          | 1.67E-04           | 1.88E-04            | 3.47E-03        | 1.49E-03            | 0.00244924 |
| SN25                    | 3.40E-01         | 0.154511       | 3.02E-01           | 2.89E-03           | 2.40E-02          | 1.51E-03          | 8.37E-04           | 1.94E-02            | 1.95E-03        | 1.43E-01            | 0.01032028 |
| SN26                    | 5.84E-01         | 0.309211       | 1.05E-04           | 2.01E-02           | 4.19E-05          | 0.00E+00          | 2.09E-05           | 4.19E-04            | 2.78E-03        | 8.23E-02            | 0.00102575 |
| SN27                    | 2.35E-01         | 0.602386       | 7.77E-02           | 4.50E-03           | 2.31E-02          | 1.36E-03          | 4.40E-04           | 6.49E-03            | 2.30E-03        | 3.67E-02            | 0.01009001 |
| SN28                    | 4.03E-01         | 0.179736       | 1.45E-01           | 1.71E-01           | 2.30E-02          | 4.46E-03          | 3.33E-03           | 2.03E-02            | 9.76E-03        | 2.24E-02            | 0.01821227 |
| SN29                    | 3.67E-01         | 0.054134       | 3.09E-01           | 2.49E-03           | 1.10E-01          | 6.34E-03          | 2.01E-03           | 2.90E-02            | 1.78E-03        | 1.06E-01            | 0.01235085 |
| SN30                    | 1.49E-01         | 0.000691       | 3.29E-03           | 3.35E-04           | 3.77E-04          | 2.51E-04          | 6.09E-03           | 0.00E+00            | 8.28E-01        | 9.61E-03            | 0.00267951 |

|      |          |          |          |          |          |          |          |          |          |          |            |
|------|----------|----------|----------|----------|----------|----------|----------|----------|----------|----------|------------|
| SN31 | 3.10E-02 | 0.000167 | 2.72E-04 | 8.37E-03 | 1.05E-04 | 5.46E-03 | 7.13E-01 | 2.09E-04 | 2.37E-01 | 4.29E-03 | 0.00016747 |
| SN32 | 5.75E-01 | 0.067637 | 4.44E-02 | 1.26E-01 | 3.25E-02 | 4.17E-03 | 2.36E-02 | 7.66E-02 | 3.62E-03 | 4.27E-02 | 0.00408206 |
| SN33 | 1.88E-01 | 0.25359  | 7.81E-02 | 2.15E-01 | 2.84E-02 | 4.52E-03 | 5.36E-03 | 1.27E-01 | 4.75E-02 | 4.16E-02 | 0.01021562 |
| SN34 | 1.02E-01 | 0.255286 | 1.57E-01 | 3.96E-02 | 8.58E-04 | 1.11E-03 | 5.07E-03 | 4.19E-05 | 7.95E-04 | 4.38E-01 | 0.00020934 |
| SN35 | 2.64E-01 | 0.214947 | 2.18E-01 | 6.07E-04 | 7.90E-02 | 2.85E-03 | 7.12E-04 | 4.00E-02 | 1.19E-03 | 1.68E-01 | 0.01094829 |
| SN36 | 1.16E-01 | 0.8009   | 2.66E-02 | 1.88E-04 | 8.37E-03 | 4.19E-04 | 1.26E-04 | 3.71E-03 | 2.93E-04 | 4.27E-02 | 0.00098388 |
| SN37 | 1.12E-01 | 0.068244 | 3.87E-01 | 5.23E-03 | 1.89E-02 | 1.65E-03 | 1.09E-03 | 1.11E-01 | 6.57E-03 | 2.63E-01 | 0.02614612 |
| SN38 | 2.77E-02 | 0.93609  | 1.47E-04 | 2.18E-03 | 1.75E-02 | 0.00E+00 | 1.26E-04 | 2.09E-05 | 9.78E-03 | 2.43E-03 | 0.00399833 |
| SN39 | 1.27E-01 | 0.192234 | 1.86E-01 | 1.43E-01 | 4.75E-02 | 2.01E-03 | 1.44E-03 | 7.32E-02 | 1.81E-02 | 1.88E-01 | 0.02248273 |
| SN40 | 3.33E-03 | 0.034394 | 9.21E-04 | 4.81E-04 | 2.09E-05 | 0.00E+00 | 5.02E-04 | 1.17E-03 | 9.49E-01 | 9.99E-03 | 0          |
| SN41 | 1.16E-01 | 0.525539 | 9.37E-02 | 5.65E-02 | 1.97E-02 | 2.53E-03 | 2.51E-03 | 2.43E-02 | 2.45E-03 | 1.39E-01 | 0.01756332 |
| SN42 | 4.33E-01 | 0.512435 | 1.93E-03 | 5.36E-03 | 7.95E-04 | 9.63E-04 | 7.54E-04 | 0.00E+00 | 2.09E-05 | 4.40E-02 | 0.00054427 |
| SN43 | 8.24E-01 | 0.00427  | 2.18E-02 | 1.47E-04 | 1.15E-01 | 3.98E-04 | 2.09E-05 | 2.51E-04 | 3.06E-02 | 2.64E-03 | 0.00023027 |
| SN44 | 6.09E-01 | 0.171112 | 8.69E-02 | 1.52E-02 | 4.94E-02 | 4.38E-03 | 1.03E-03 | 1.14E-02 | 3.47E-03 | 3.43E-02 | 0.01379527 |
| SN45 | 1.89E-01 | 0.424304 | 1.70E-01 | 5.12E-02 | 3.35E-02 | 7.33E-03 | 5.78E-03 | 2.47E-02 | 3.64E-03 | 8.78E-02 | 0.0022399  |
| SN46 | 1.99E-01 | 0.599267 | 4.42E-02 | 1.55E-02 | 3.73E-02 | 1.44E-03 | 2.39E-03 | 4.04E-02 | 7.22E-03 | 4.92E-02 | 0.00385179 |
| SN47 | 8.28E-02 | 0.291061 | 2.47E-01 | 4.19E-05 | 2.97E-01 | 1.30E-03 | 0.00E+00 | 2.57E-02 | 5.57E-03 | 3.83E-02 | 0.01063429 |
| SN48 | 6.09E-03 | 0.888047 | 1.01E-01 | 4.81E-04 | 2.81E-03 | 0.00E+00 | 0.00E+00 | 0.00E+00 | 0.00E+00 | 1.05E-04 | 0.00125602 |
| SN49 | 7.51E-01 | 0.244463 | 1.26E-04 | 4.19E-05 | 1.05E-04 | 2.09E-05 | 0.00E+00 | 2.09E-05 | 2.09E-05 | 2.93E-04 | 0.0042914  |
| SN50 | 2.05E-03 | 0.64551  | 0.00E+00 | 0.00E+00 | 0.00E+00 | 0.00E+00 | 0.00E+00 | 0.00E+00 | 3.52E-01 | 0.00E+00 | 0          |
| SN51 | 3.94E-02 | 0.799498 | 9.85E-02 | 5.02E-04 | 1.16E-02 | 3.18E-03 | 4.19E-05 | 2.09E-05 | 6.28E-05 | 4.68E-02 | 0.00029307 |
| SN52 | 1.98E-01 | 0.123885 | 3.88E-01 | 1.78E-03 | 2.53E-02 | 4.84E-03 | 7.77E-03 | 6.98E-02 | 8.54E-03 | 1.47E-01 | 0.02543437 |
| SN53 | 3.40E-01 | 0.136634 | 3.57E-01 | 7.64E-03 | 3.51E-02 | 4.69E-03 | 4.79E-03 | 2.79E-02 | 3.41E-03 | 6.71E-02 | 0.01534436 |
| SN54 | 4.13E-01 | 0.114193 | 2.20E-01 | 7.41E-03 | 1.44E-02 | 2.22E-03 | 9.63E-04 | 4.18E-02 | 0.00E+00 | 1.77E-01 | 0.00864559 |
| SN55 | 4.19E-05 | 0.978522 | 1.05E-04 | 1.67E-04 | 2.30E-04 | 1.05E-04 | 2.09E-05 | 0.00E+00 | 3.56E-04 | 2.03E-02 | 0.0001256  |
| SN56 | 7.58E-03 | 0.991208 | 8.37E-05 | 1.26E-04 | 0.00E+00 | 1.26E-04 | 0.00E+00 | 0.00E+00 | 3.77E-04 | 0.00E+00 | 0.00050241 |
| SN57 | 4.35E-01 | 0.028826 | 2.81E-01 | 2.51E-04 | 5.28E-02 | 1.57E-02 | 6.28E-05 | 8.23E-03 | 6.70E-04 | 1.57E-01 | 0.02116391 |
| SN58 | 4.44E-01 | 0.2879   | 8.79E-04 | 2.43E-01 | 7.33E-04 | 2.09E-04 | 0.00E+00 | 6.28E-05 | 2.31E-02 | 1.05E-04 | 0.00016747 |
| SN59 | 2.69E-01 | 0.104626 | 3.44E-01 | 4.35E-03 | 1.70E-01 | 3.94E-02 | 9.84E-04 | 1.56E-02 | 5.86E-04 | 4.12E-02 | 0.01015282 |
| SN60 | 6.56E-01 | 0.002428 | 4.19E-05 | 0.00E+00 | 5.02E-04 | 0.00E+00 | 2.09E-05 | 0.00E+00 | 3.39E-01 | 2.09E-05 | 0.00175843 |
| SN61 | 7.18E-01 | 0.279213 | 1.47E-04 | 8.37E-05 | 8.37E-05 | 3.56E-04 | 2.09E-05 | 4.19E-05 | 1.70E-03 | 1.05E-04 | 0.00020934 |
| SN62 | 1.19E-01 | 0.324011 | 1.31E-01 | 7.79E-02 | 3.83E-02 | 3.39E-03 | 4.56E-03 | 4.10E-03 | 8.51E-02 | 1.28E-01 | 0.08476031 |
| SN63 | 7.81E-01 | 0.024053 | 3.22E-03 | 3.40E-02 | 1.23E-02 | 0.00E+00 | 4.75E-03 | 3.77E-04 | 1.03E-01 | 4.61E-04 | 0.03690601 |
| SN64 | 9.31E-01 | 0.042579 | 3.98E-04 | 5.46E-03 | 5.65E-04 | 2.09E-05 | 7.12E-04 | 2.09E-05 | 9.48E-03 | 1.07E-03 | 0.00900147 |
| SN65 | 9.64E-01 | 0.014046 | 1.88E-04 | 4.98E-03 | 2.09E-05 | 0.00E+00 | 1.67E-04 | 4.19E-05 | 8.54E-03 | 2.30E-04 | 0.00776638 |
| SN66 | 1.97E-03 | 0.000461 | 0.00E+00 | 0.00E+00 | 4.19E-05 | 0.00E+00 | 0.00E+00 | 0.00E+00 | 9.98E-01 | 0.00E+00 | 0          |
| SN67 | 8.57E-01 | 0.085933 | 2.24E-03 | 3.98E-04 | 3.41E-03 | 6.28E-05 | 0.00E+00 | 0.00E+00 | 4.44E-02 | 3.85E-03 | 0.0024283  |
| SN68 | 2.20E-02 | 0.310153 | 1.11E-02 | 1.52E-01 | 1.49E-02 | 5.65E-04 | 7.42E-02 | 1.28E-03 | 1.73E-01 | 1.95E-02 | 0.2206615  |
| SN69 | 4.04E-01 | 0.28162  | 6.66E-03 | 7.22E-03 | 1.21E-03 | 8.37E-05 | 2.22E-03 | 3.35E-04 | 2.78E-01 | 3.75E-03 | 0.01538623 |

| S2.3 At the order level |                     |                   |                      |                      |                          |                        |                        |                     |             |                        |                        |
|-------------------------|---------------------|-------------------|----------------------|----------------------|--------------------------|------------------------|------------------------|---------------------|-------------|------------------------|------------------------|
|                         | <i>Actinomyceta</i> | <i>Bacillales</i> | <i>Bacteroidales</i> | <i>Clostridiales</i> | <i>Enterobacteriales</i> | <i>Fusobacteriales</i> | <i>Lactobacillales</i> | <i>Neisseriales</i> | Others      | <i>Pseudomonadales</i> | <i>Selenomonadales</i> |
| SN01                    | 4.21E-02            | 3.30E-02          | 2.57E-01             | 7.69E-02             | 0.00E+00                 | 7.78E-02               | 0.268536739            | 3.15E-02            | 0.160456353 | 2.85E-03               | 4.99E-02               |
| SN02                    | 1.03E-01            | 1.05E-02          | 2.14E-01             | 0.00E+00             | 8.77E-03                 | 0.00E+00               | 0.342348754            | 0.00E+00            | 0.015260624 | 0.00E+00               | 3.06E-01               |
| SN03                    | 6.26E-02            | 0.00E+00          | 1.00E-01             | 3.70E-02             | 2.09E-05                 | 2.91E-03               | 0.103495918            | 0.00E+00            | 0.058970065 | 4.03E-01               | 2.31E-01               |
| SN04                    | 3.87E-01            | 2.93E-04          | 4.01E-02             | 1.68E-02             | 0.00E+00                 | 2.72E-02               | 0.421456981            | 1.06E-02            | 0.058551392 | 0.00E+00               | 3.84E-02               |
| SN05                    | 0.00E+00            | 0.00E+00          | 1.53E-03             | 0.00E+00             | 8.49E-01                 | 0.00E+00               | 0.002805108            | 0.00E+00            | 0           | 1.47E-01               | 4.19E-05               |
| SN06                    | 9.55E-03            | 4.19E-05          | 1.76E-02             | 7.31E-03             | 1.58E-01                 | 2.76E-03               | 0.012685786            | 4.40E-04            | 0.021582583 | 7.49E-01               | 2.08E-02               |
| SN07                    | 1.91E-01            | 1.47E-04          | 1.11E-01             | 5.40E-03             | 2.72E-04                 | 2.93E-04               | 0.332468076            | 1.89E-01            | 0.025497174 | 1.90E-03               | 1.43E-01               |
| SN08                    | 3.96E-01            | 2.55E-03          | 9.14E-02             | 5.05E-02             | 1.47E-04                 | 2.92E-02               | 0.237429349            | 2.55E-03            | 0.052669039 | 4.40E-03               | 1.33E-01               |
| SN09                    | 2.26E-01            | 1.06E-02          | 9.13E-02             | 4.68E-02             | 8.37E-05                 | 4.23E-03               | 0.403935524            | 2.92E-02            | 0.064015072 | 0.00E+00               | 1.24E-01               |
| SN10                    | 1.26E-01            | 4.31E-01          | 2.66E-03             | 3.76E-02             | 6.18E-03                 | 8.56E-02               | 0.111534436            | 1.44E-02            | 0.166338706 | 1.28E-03               | 1.66E-02               |
| SN11                    | 9.88E-01            | 4.10E-03          | 8.37E-04             | 1.65E-03             | 0.00E+00                 | 2.93E-04               | 0.000188403            | 4.19E-05            | 0.004186728 | 2.09E-04               | 2.30E-04               |

|      |          |          |          |          |          |          |             |          |             |          |          |
|------|----------|----------|----------|----------|----------|----------|-------------|----------|-------------|----------|----------|
| SN12 | 1.42E-02 | 9.33E-01 | 2.68E-03 | 2.70E-03 | 6.70E-04 | 2.32E-03 | 0.014109274 | 7.75E-04 | 0.023948085 | 2.93E-03 | 2.66E-03 |
| SN13 | 7.39E-02 | 1.39E-02 | 1.29E-01 | 2.62E-02 | 1.09E-03 | 6.04E-02 | 0.288570232 | 1.99E-01 | 0.10270044  | 2.39E-03 | 1.03E-01 |
| SN14 | 6.77E-02 | 5.93E-01 | 6.28E-05 | 8.37E-05 | 6.39E-02 | 2.09E-05 | 0.271886121 | 8.37E-05 | 0.002491103 | 7.12E-04 | 8.37E-05 |
| SN15 | 4.71E-02 | 1.47E-04 | 5.34E-02 | 1.11E-02 | 8.16E-04 | 4.81E-04 | 0.035084781 | 3.35E-03 | 0.754092527 | 2.99E-03 | 9.15E-02 |
| SN16 | 1.96E-01 | 2.82E-02 | 4.49E-01 | 4.16E-02 | 6.07E-04 | 2.87E-02 | 0.128993092 | 8.65E-03 | 0.044714256 | 6.28E-05 | 7.34E-02 |
| SN17 | 8.17E-01 | 4.19E-04 | 3.92E-02 | 5.20E-02 | 4.19E-05 | 4.84E-03 | 0.007096504 | 6.28E-05 | 0.024052753 | 0.00E+00 | 5.50E-02 |
| SN18 | 9.74E-01 | 7.54E-04 | 5.02E-04 | 7.95E-04 | 3.14E-04 | 2.30E-04 | 0.000858279 | 0.00E+00 | 0.021415114 | 8.37E-04 | 6.28E-05 |
| SN19 | 4.08E-02 | 3.12E-02 | 3.63E-02 | 1.92E-02 | 6.28E-05 | 5.37E-02 | 0.704144861 | 1.90E-02 | 0.036822273 | 0.00E+00 | 5.88E-02 |
| SN20 | 1.09E-01 | 2.70E-03 | 1.31E-01 | 1.05E-04 | 2.09E-05 | 0.00E+00 | 0.008226921 | 2.45E-02 | 0.015532761 | 0.00E+00 | 7.08E-01 |
| SN21 | 1.71E-01 | 4.81E-04 | 3.73E-01 | 2.45E-02 | 0.00E+00 | 4.96E-03 | 0.19815784  | 1.19E-03 | 0.050868746 | 2.09E-05 | 1.76E-01 |
| SN22 | 3.02E-01 | 1.35E-02 | 5.56E-02 | 5.45E-02 | 0.00E+00 | 2.01E-02 | 0.384697509 | 1.32E-02 | 0.05434373  | 1.26E-04 | 1.02E-01 |
| SN23 | 7.76E-01 | 4.19E-05 | 1.14E-01 | 2.20E-02 | 4.19E-05 | 1.38E-03 | 0.012288047 | 1.26E-04 | 0.028658154 | 0.00E+00 | 4.53E-02 |
| SN24 | 7.60E-03 | 9.57E-01 | 3.58E-03 | 1.97E-02 | 9.21E-04 | 1.88E-04 | 0.001779359 | 1.05E-04 | 0.005673017 | 2.49E-03 | 1.49E-03 |
| SN25 | 3.30E-01 | 2.01E-03 | 3.02E-01 | 2.40E-02 | 3.77E-04 | 1.94E-02 | 0.15250157  | 2.60E-03 | 0.024429558 | 0.00E+00 | 1.43E-01 |
| SN26 | 5.81E-01 | 1.67E-04 | 1.05E-04 | 4.19E-05 | 4.19E-05 | 4.19E-04 | 0.309043333 | 2.09E-05 | 0.026439188 | 4.19E-05 | 8.23E-02 |
| SN27 | 2.31E-01 | 2.07E-03 | 7.77E-02 | 2.31E-02 | 1.47E-04 | 6.49E-03 | 0.600314005 | 3.37E-03 | 0.018651874 | 0.00E+00 | 3.67E-02 |
| SN28 | 3.98E-01 | 5.85E-02 | 1.45E-01 | 2.30E-02 | 1.05E-04 | 2.03E-02 | 0.121205778 | 4.51E-02 | 0.164831484 | 1.95E-03 | 2.24E-02 |
| SN29 | 3.43E-01 | 1.10E-02 | 3.09E-01 | 1.10E-01 | 0.00E+00 | 2.90E-02 | 0.043123299 | 2.20E-03 | 0.045991208 | 1.47E-04 | 1.06E-01 |
| SN30 | 1.49E-01 | 5.65E-04 | 3.29E-03 | 3.77E-04 | 6.63E-01 | 0.00E+00 | 0.000125602 | 3.14E-04 | 0.012727653 | 1.61E-01 | 9.61E-03 |
| SN31 | 3.10E-02 | 0.00E+00 | 2.72E-04 | 1.05E-04 | 1.72E-01 | 2.09E-04 | 0.000167469 | 8.35E-03 | 0.718547205 | 6.55E-02 | 4.29E-03 |
| SN32 | 5.74E-01 | 4.63E-03 | 4.44E-02 | 3.25E-02 | 0.00E+00 | 7.66E-02 | 0.063010258 | 1.25E-01 | 0.0363408   | 0.00E+00 | 4.27E-02 |
| SN33 | 1.88E-01 | 2.25E-02 | 7.81E-02 | 2.84E-02 | 0.00E+00 | 1.27E-01 | 0.231128323 | 2.15E-01 | 0.067720327 | 1.47E-04 | 4.16E-02 |
| SN34 | 8.20E-02 | 1.34E-03 | 1.57E-01 | 8.58E-04 | 2.09E-05 | 4.19E-05 | 0.253945991 | 1.28E-03 | 0.064622148 | 7.33E-04 | 4.38E-01 |
| SN35 | 2.37E-01 | 2.27E-02 | 2.18E-01 | 7.90E-02 | 0.00E+00 | 4.00E-02 | 0.19229642  | 5.44E-04 | 0.042390622 | 0.00E+00 | 1.68E-01 |
| SN36 | 1.13E-01 | 5.33E-01 | 2.66E-02 | 8.37E-03 | 6.28E-05 | 3.71E-03 | 0.267929663 | 1.47E-04 | 0.004249529 | 6.28E-05 | 4.27E-02 |
| SN37 | 1.10E-01 | 1.37E-02 | 3.87E-01 | 1.89E-02 | 0.00E+00 | 1.11E-01 | 0.054553067 | 4.94E-03 | 0.037764287 | 2.09E-05 | 2.63E-01 |
| SN38 | 2.72E-02 | 9.34E-01 | 1.47E-04 | 1.75E-02 | 8.42E-03 | 2.09E-05 | 0.002198032 | 1.67E-04 | 0.007138371 | 8.58E-04 | 2.43E-03 |
| SN39 | 1.20E-01 | 2.05E-02 | 1.86E-01 | 4.75E-02 | 4.19E-05 | 7.32E-02 | 0.171718652 | 1.39E-01 | 0.054615868 | 1.05E-04 | 1.88E-01 |
| SN40 | 3.31E-03 | 2.03E-02 | 9.21E-04 | 2.09E-05 | 0.00E+00 | 1.17E-03 | 0.014046473 | 4.81E-04 | 0.000523341 | 9.49E-01 | 9.99E-03 |
| SN41 | 1.12E-01 | 2.11E-02 | 9.37E-02 | 1.97E-02 | 0.00E+00 | 2.43E-02 | 0.504437932 | 5.35E-02 | 0.032216873 | 2.09E-05 | 1.39E-01 |
| SN42 | 4.26E-01 | 2.97E-03 | 1.93E-03 | 7.95E-04 | 0.00E+00 | 0.00E+00 | 0.509462005 | 5.28E-03 | 0.009880678 | 2.09E-05 | 4.40E-02 |
| SN43 | 8.11E-01 | 1.05E-04 | 2.18E-02 | 1.15E-01 | 2.48E-02 | 2.51E-04 | 0.004165794 | 1.26E-04 | 0.014172075 | 5.67E-03 | 2.64E-03 |
| SN44 | 6.04E-01 | 1.42E-03 | 8.69E-02 | 4.94E-02 | 6.28E-05 | 1.14E-02 | 0.169688089 | 1.34E-02 | 0.029055893 | 0.00E+00 | 3.43E-02 |
| SN45 | 1.80E-01 | 4.36E-02 | 1.70E-01 | 3.35E-02 | 4.19E-05 | 2.47E-02 | 0.380699184 | 4.06E-02 | 0.039166841 | 2.09E-05 | 8.78E-02 |
| SN46 | 1.97E-01 | 6.41E-03 | 4.42E-02 | 3.73E-02 | 1.72E-03 | 4.04E-02 | 0.592861629 | 1.55E-02 | 0.015553695 | 0.00E+00 | 4.92E-02 |
| SN47 | 7.80E-02 | 2.51E-04 | 2.47E-01 | 2.97E-01 | 1.47E-04 | 2.57E-02 | 0.290810132 | 4.19E-05 | 0.022147792 | 0.00E+00 | 3.83E-02 |
| SN48 | 2.72E-03 | 2.09E-05 | 1.01E-01 | 2.81E-03 | 0.00E+00 | 0.00E+00 | 0.888025958 | 0.00E+00 | 0.005107808 | 0.00E+00 | 1.05E-04 |
| SN49 | 7.51E-01 | 1.28E-03 | 1.26E-04 | 1.05E-04 | 2.09E-05 | 2.09E-05 | 0.2431861   | 0.00E+00 | 0.004354197 | 0.00E+00 | 2.93E-04 |
| SN50 | 2.05E-03 | 4.19E-05 | 0.00E+00 | 0.00E+00 | 3.52E-01 | 0.00E+00 | 0.645467867 | 0.00E+00 | 0           | 6.07E-04 | 0.00E+00 |
| SN51 | 1.26E-03 | 2.92E-01 | 9.85E-02 | 1.16E-02 | 2.09E-05 | 2.09E-05 | 0.507640779 | 5.02E-04 | 0.041678878 | 4.19E-05 | 4.68E-02 |
| SN52 | 1.95E-01 | 3.53E-02 | 3.88E-01 | 2.53E-02 | 2.72E-04 | 6.98E-02 | 0.088633033 | 1.74E-03 | 0.049068453 | 0.00E+00 | 1.47E-01 |
| SN53 | 3.31E-01 | 4.67E-03 | 3.57E-01 | 3.51E-02 | 4.19E-05 | 2.79E-02 | 0.131965669 | 7.10E-03 | 0.038099226 | 0.00E+00 | 6.71E-02 |
| SN54 | 4.11E-01 | 1.56E-02 | 2.20E-01 | 1.44E-02 | 0.00E+00 | 4.18E-02 | 0.098639313 | 3.58E-03 | 0.017898263 | 0.00E+00 | 1.77E-01 |
| SN55 | 2.09E-05 | 0.00E+00 | 1.05E-04 | 2.30E-04 | 3.35E-04 | 0.00E+00 | 0.978522085 | 0.00E+00 | 0.00046054  | 0.00E+00 | 2.03E-02 |
| SN56 | 3.77E-04 | 1.39E-02 | 8.37E-05 | 0.00E+00 | 3.56E-04 | 0.00E+00 | 0.977307934 | 0.00E+00 | 0.007954783 | 2.09E-05 | 0.00E+00 |
| SN57 | 3.84E-01 | 9.06E-03 | 2.81E-01 | 5.28E-02 | 0.00E+00 | 8.23E-03 | 0.019761357 | 2.09E-04 | 0.088591166 | 0.00E+00 | 1.57E-01 |
| SN58 | 4.44E-01 | 3.87E-03 | 8.79E-04 | 7.33E-04 | 1.05E-04 | 6.28E-05 | 0.284027632 | 2.19E-01 | 0.047310027 | 8.37E-05 | 1.05E-04 |
| SN59 | 2.65E-01 | 2.22E-03 | 3.44E-01 | 1.70E-01 | 5.86E-04 | 1.56E-02 | 0.102407369 | 3.08E-03 | 0.055955621 | 0.00E+00 | 4.12E-02 |
| SN60 | 6.56E-01 | 6.49E-04 | 4.19E-05 | 5.02E-04 | 3.39E-01 | 0.00E+00 | 0.001779359 | 0.00E+00 | 0.001904961 | 0.00E+00 | 2.09E-05 |
| SN61 | 7.18E-01 | 2.56E-02 | 1.47E-04 | 8.37E-05 | 1.70E-03 | 4.19E-05 | 0.253569186 | 0.00E+00 | 0.000816412 | 0.00E+00 | 1.05E-04 |
| SN62 | 1.13E-01 | 1.01E-01 | 1.31E-01 | 3.83E-02 | 5.13E-03 | 4.10E-03 | 0.22340381  | 6.51E-03 | 0.170776638 | 7.88E-02 | 1.28E-01 |
| SN63 | 7.81E-01 | 1.66E-02 | 3.22E-03 | 1.23E-02 | 3.14E-04 | 3.77E-04 | 0.007494243 | 6.43E-03 | 0.07360268  | 9.85E-02 | 4.61E-04 |
| SN64 | 9.31E-01 | 4.23E-02 | 3.98E-04 | 5.65E-04 | 3.47E-03 | 2.09E-05 | 0.000293071 | 0.00E+00 | 0.015490894 | 5.71E-03 | 1.07E-03 |
| SN65 | 9.64E-01 | 8.90E-03 | 1.88E-04 | 2.09E-05 | 1.15E-03 | 4.19E-05 | 0.005149676 | 0.00E+00 | 0.012978857 | 7.33E-03 | 2.30E-04 |



|      |          |          |          |          |          |          |             |          |             |          |          |
|------|----------|----------|----------|----------|----------|----------|-------------|----------|-------------|----------|----------|
| SN66 | 1.97E-03 | 0.00E+00 | 0.00E+00 | 4.19E-05 | 9.96E-01 | 0.00E+00 | 0.00046054  | 0.00E+00 | 0           | 1.63E-03 | 0.00E+00 |
| SN67 | 8.57E-01 | 7.95E-04 | 2.24E-03 | 3.41E-03 | 2.96E-02 | 0.00E+00 | 0.085137115 | 0.00E+00 | 0.003035378 | 1.48E-02 | 3.85E-03 |
| SN68 | 2.20E-02 | 2.90E-01 | 1.11E-02 | 1.49E-02 | 2.37E-03 | 1.28E-03 | 0.020326565 | 4.19E-05 | 0.455097341 | 1.63E-01 | 1.95E-02 |
| SN69 | 4.03E-01 | 2.80E-01 | 6.66E-03 | 1.21E-03 | 8.79E-04 | 3.35E-04 | 0.001925895 | 1.00E-03 | 0.024408625 | 2.77E-01 | 3.75E-03 |

| S2.4 At the family level |                      |                       |                       |                      |                     |                      |          |                       |                      |                       |                        |
|--------------------------|----------------------|-----------------------|-----------------------|----------------------|---------------------|----------------------|----------|-----------------------|----------------------|-----------------------|------------------------|
|                          | <i>Actinomycetae</i> | <i>Corynebacteria</i> | <i>Enterobacteria</i> | <i>Enterococceae</i> | <i>Micrococceae</i> | <i>Moraxellaceae</i> | Others   | <i>Prevotellaceae</i> | <i>Staphylococci</i> | <i>Streptococceae</i> | <i>Veillonellaceae</i> |
| SN01                     | 1.80E-02             | 1.26E-04              | 0.00E+00              | 0.00E+00             | 2.35E-02            | 2.57E-03             | 4.48E-01 | 2.31E-01              | 0.00E+00             | 2.26E-01              | 4.99E-02               |
| SN02                     | 8.12E-03             | 0.00E+00              | 8.77E-03              | 5.23E-04             | 9.51E-02            | 0.00E+00             | 4.32E-02 | 2.14E-01              | 0.00E+00             | 3.24E-01              | 3.06E-01               |
| SN03                     | 4.89E-02             | 0.00E+00              | 2.09E-05              | 0.00E+00             | 1.25E-02            | 4.29E-02             | 4.70E-01 | 1.00E-01              | 0.00E+00             | 9.36E-02              | 2.31E-01               |
| SN04                     | 2.87E-01             | 3.83E-03              | 0.00E+00              | 0.00E+00             | 9.56E-02            | 0.00E+00             | 1.31E-01 | 3.64E-02              | 2.09E-05             | 4.07E-01              | 3.84E-02               |
| SN05                     | 0.00E+00             | 0.00E+00              | 8.49E-01              | 0.00E+00             | 0.00E+00            | 1.47E-01             | 2.81E-03 | 1.53E-03              | 0.00E+00             | 0.00E+00              | 4.19E-05               |
| SN06                     | 4.54E-03             | 4.96E-03              | 1.58E-01              | 1.03E-03             | 0.00E+00            | 7.49E-01             | 3.26E-02 | 1.73E-02              | 0.00E+00             | 1.16E-02              | 2.08E-02               |
| SN07                     | 1.44E-01             | 6.28E-05              | 2.72E-04              | 0.00E+00             | 4.70E-02            | 1.82E-03             | 3.70E-01 | 1.11E-01              | 0.00E+00             | 1.83E-01              | 1.43E-01               |
| SN08                     | 3.13E-01             | 1.53E-03              | 1.47E-04              | 4.19E-05             | 8.15E-02            | 3.50E-03             | 1.64E-01 | 9.01E-02              | 8.37E-05             | 2.13E-01              | 1.33E-01               |
| SN09                     | 1.49E-01             | 1.88E-04              | 8.37E-05              | 0.00E+00             | 7.67E-02            | 0.00E+00             | 2.11E-01 | 6.15E-02              | 0.00E+00             | 3.77E-01              | 1.24E-01               |
| SN10                     | 1.18E-01             | 6.80E-03              | 6.18E-03              | 0.00E+00             | 7.95E-04            | 9.21E-04             | 3.36E-01 | 1.99E-03              | 4.31E-01             | 8.13E-02              | 1.66E-02               |
| SN11                     | 1.70E-03             | 9.84E-01              | 0.00E+00              | 2.09E-05             | 2.72E-04            | 8.37E-05             | 8.48E-03 | 8.37E-04              | 4.04E-03             | 1.26E-04              | 2.30E-04               |
| SN12                     | 5.48E-03             | 4.79E-03              | 6.70E-04              | 0.00E+00             | 9.63E-04            | 2.55E-03             | 4.19E-02 | 2.66E-03              | 9.33E-01             | 5.32E-03              | 2.66E-03               |
| SN13                     | 1.70E-02             | 2.24E-03              | 1.09E-03              | 0.00E+00             | 5.46E-02            | 2.28E-03             | 4.51E-01 | 9.54E-02              | 5.15E-03             | 2.68E-01              | 1.03E-01               |
| SN14                     | 1.47E-04             | 6.75E-02              | 6.39E-02              | 2.72E-01             | 2.09E-05            | 5.65E-04             | 3.66E-03 | 6.28E-05              | 5.92E-01             | 2.09E-04              | 8.37E-05               |
| SN15                     | 4.12E-02             | 1.44E-03              | 8.16E-04              | 6.28E-05             | 4.23E-03            | 2.60E-03             | 8.12E-01 | 3.20E-02              | 0.00E+00             | 1.47E-02              | 9.15E-02               |
| SN16                     | 1.31E-01             | 2.78E-02              | 6.07E-04              | 0.00E+00             | 3.75E-02            | 4.19E-05             | 2.03E-01 | 3.99E-01              | 3.68E-03             | 1.24E-01              | 7.34E-02               |
| SN17                     | 7.20E-01             | 1.52E-02              | 4.19E-05              | 0.00E+00             | 8.15E-02            | 0.00E+00             | 8.47E-02 | 3.67E-02              | 0.00E+00             | 6.49E-03              | 5.50E-02               |
| SN18                     | 8.37E-04             | 9.64E-01              | 3.14E-04              | 5.44E-04             | 2.26E-03            | 6.49E-04             | 3.05E-02 | 4.81E-04              | 1.88E-04             | 2.30E-04              | 6.28E-05               |
| SN19                     | 4.05E-02             | 1.47E-04              | 6.28E-05              | 1.47E-04             | 1.47E-04            | 0.00E+00             | 1.32E-01 | 3.63E-02              | 3.12E-02             | 7.01E-01              | 5.88E-02               |
| SN20                     | 1.09E-01             | 0.00E+00              | 2.09E-05              | 7.75E-03             | 6.28E-05            | 0.00E+00             | 4.01E-02 | 1.31E-01              | 2.68E-03             | 4.81E-04              | 7.08E-01               |
| SN21                     | 1.57E-01             | 7.54E-04              | 0.00E+00              | 0.00E+00             | 1.36E-02            | 2.09E-05             | 9.28E-02 | 3.72E-01              | 0.00E+00             | 1.88E-01              | 1.76E-01               |
| SN22                     | 2.42E-01             | 5.28E-03              | 0.00E+00              | 0.00E+00             | 5.47E-02            | 1.05E-04             | 1.71E-01 | 5.04E-02              | 2.09E-05             | 3.75E-01              | 1.02E-01               |
| SN23                     | 7.66E-01             | 2.09E-05              | 4.19E-05              | 0.00E+00             | 9.40E-03            | 0.00E+00             | 5.33E-02 | 1.14E-01              | 0.00E+00             | 1.14E-02              | 4.53E-02               |
| SN24                     | 3.16E-03             | 2.83E-03              | 9.21E-04              | 0.00E+00             | 7.95E-04            | 1.61E-03             | 2.76E-02 | 3.56E-03              | 9.56E-01             | 1.72E-03              | 1.49E-03               |
| SN25                     | 3.08E-01             | 9.63E-04              | 3.77E-04              | 0.00E+00             | 2.09E-02            | 0.00E+00             | 7.71E-02 | 3.01E-01              | 3.77E-04             | 1.49E-01              | 1.43E-01               |
| SN26                     | 4.49E-01             | 6.28E-03              | 4.19E-05              | 0.00E+00             | 1.26E-01            | 0.00E+00             | 4.19E-02 | 1.05E-04              | 1.67E-04             | 2.94E-01              | 8.23E-02               |
| SN27                     | 1.73E-01             | 1.36E-03              | 1.47E-04              | 2.09E-05             | 5.67E-02            | 0.00E+00             | 6.40E-02 | 7.13E-02              | 0.00E+00             | 5.96E-01              | 3.67E-02               |
| SN28                     | 7.82E-02             | 4.65E-03              | 1.05E-04              | 0.00E+00             | 3.14E-01            | 1.51E-03             | 3.16E-01 | 1.45E-01              | 8.37E-05             | 1.18E-01              | 2.24E-02               |
| SN29                     | 1.66E-01             | 2.55E-02              | 0.00E+00              | 0.00E+00             | 1.51E-01            | 1.05E-04             | 2.14E-01 | 3.04E-01              | 1.26E-04             | 3.22E-02              | 1.06E-01               |
| SN30                     | 1.05E-03             | 1.47E-01              | 6.63E-01              | 2.09E-05             | 0.00E+00            | 1.61E-01             | 1.39E-02 | 3.29E-03              | 5.65E-04             | 8.37E-05              | 9.61E-03               |
| SN31                     | 3.05E-02             | 4.81E-04              | 1.72E-01              | 0.00E+00             | 0.00E+00            | 6.49E-04             | 7.92E-01 | 2.51E-04              | 0.00E+00             | 2.09E-05              | 4.29E-03               |
| SN32                     | 2.53E-01             | 3.06E-01              | 0.00E+00              | 0.00E+00             | 1.58E-02            | 0.00E+00             | 2.92E-01 | 3.63E-02              | 1.88E-03             | 5.23E-02              | 4.27E-02               |
| SN33                     | 4.35E-02             | 0.00E+00              | 0.00E+00              | 0.00E+00             | 1.45E-01            | 1.47E-04             | 5.43E-01 | 5.06E-02              | 2.07E-03             | 1.74E-01              | 4.16E-02               |
| SN34                     | 7.21E-02             | 2.30E-04              | 2.09E-05              | 0.00E+00             | 9.67E-03            | 7.33E-04             | 9.60E-02 | 1.57E-01              | 1.34E-03             | 2.25E-01              | 4.38E-01               |
| SN35                     | 1.84E-01             | 1.19E-03              | 0.00E+00              | 0.00E+00             | 5.25E-02            | 0.00E+00             | 2.00E-01 | 2.10E-01              | 0.00E+00             | 1.85E-01              | 1.68E-01               |
| SN36                     | 7.24E-03             | 8.38E-02              | 6.28E-05              | 5.42E-03             | 2.21E-02            | 6.28E-05             | 2.09E-02 | 2.57E-02              | 5.31E-01             | 2.61E-01              | 4.27E-02               |
| SN37                     | 1.07E-01             | 2.30E-04              | 0.00E+00              | 0.00E+00             | 1.97E-03            | 0.00E+00             | 2.04E-01 | 3.77E-01              | 5.65E-04             | 4.54E-02              | 2.63E-01               |
| SN38                     | 4.19E-04             | 2.63E-02              | 8.42E-03              | 4.81E-04             | 1.26E-04            | 5.02E-04             | 2.67E-02 | 1.47E-04              | 9.34E-01             | 1.44E-03              | 1.80E-03               |
| SN39                     | 1.82E-02             | 2.70E-03              | 4.19E-05              | 0.00E+00             | 9.91E-02            | 8.37E-05             | 3.71E-01 | 1.65E-01              | 5.44E-04             | 1.56E-01              | 1.88E-01               |
| SN40                     | 1.57E-03             | 8.37E-05              | 0.00E+00              | 8.58E-04             | 1.65E-03            | 9.49E-01             | 1.48E-02 | 9.21E-04              | 2.03E-02             | 6.28E-04              | 9.99E-03               |
| SN41                     | 4.71E-02             | 8.19E-03              | 0.00E+00              | 0.00E+00             | 5.65E-02            | 0.00E+00             | 1.90E-01 | 7.08E-02              | 2.09E-05             | 4.88E-01              | 1.39E-01               |
| SN42                     | 3.77E-04             | 4.20E-01              | 0.00E+00              | 0.00E+00             | 5.42E-03            | 2.09E-05             | 1.82E-02 | 6.28E-05              | 2.97E-03             | 5.09E-01              | 4.40E-02               |
| SN43                     | 6.89E-03             | 7.89E-01              | 2.48E-02              | 0.00E+00             | 7.54E-04            | 0.00E+00             | 1.50E-01 | 2.18E-02              | 2.09E-05             | 4.04E-03              | 2.64E-03               |
| SN44                     | 5.55E-01             | 1.21E-03              | 6.28E-05              | 0.00E+00             | 4.80E-02            | 0.00E+00             | 1.13E-01 | 8.33E-02              | 0.00E+00             | 1.65E-01              | 3.43E-02               |
| SN45                     | 2.74E-02             | 2.57E-03              | 4.19E-05              | 0.00E+00             | 1.50E-01            | 0.00E+00             | 3.52E-01 | 5.74E-02              | 2.09E-05             | 3.23E-01              | 8.78E-02               |
| SN46                     | 1.24E-01             | 4.75E-03              | 1.72E-03              | 0.00E+00             | 6.83E-02            | 0.00E+00             | 1.33E-01 | 3.54E-02              | 8.37E-05             | 5.84E-01              | 4.92E-02               |
| SN47                     | 3.62E-02             | 4.18E-02              | 1.47E-04              | 1.30E-03             | 0.00E+00            | 0.00E+00             | 3.80E-01 | 2.15E-01              | 2.09E-04             | 2.89E-01              | 3.62E-02               |

|      |          |          |          |          |          |          |          |          |          |          |          |
|------|----------|----------|----------|----------|----------|----------|----------|----------|----------|----------|----------|
| SN48 | 0.00E+00 | 2.72E-03 | 0.00E+00 | 8.80E-01 | 0.00E+00 | 0.00E+00 | 1.12E-01 | 0.00E+00 | 2.09E-05 | 4.90E-03 | 1.05E-04 |
| SN49 | 0.00E+00 | 7.51E-01 | 2.09E-05 | 2.43E-01 | 0.00E+00 | 0.00E+00 | 4.92E-03 | 6.28E-05 | 1.11E-03 | 0.00E+00 | 2.93E-04 |
| SN50 | 2.09E-05 | 2.03E-03 | 3.52E-01 | 6.45E-01 | 0.00E+00 | 6.07E-04 | 3.77E-04 | 0.00E+00 | 4.19E-05 | 0.00E+00 | 0.00E+00 |
| SN51 | 1.00E-03 | 0.00E+00 | 2.09E-05 | 1.53E-03 | 2.09E-04 | 4.19E-05 | 2.12E-01 | 9.73E-02 | 2.43E-01 | 3.98E-01 | 4.68E-02 |
| SN52 | 1.70E-01 | 8.37E-05 | 2.72E-04 | 1.47E-04 | 2.52E-02 | 0.00E+00 | 2.24E-01 | 3.56E-01 | 0.00E+00 | 7.78E-02 | 1.47E-01 |
| SN53 | 2.81E-01 | 2.83E-03 | 4.19E-05 | 2.09E-05 | 4.72E-02 | 0.00E+00 | 1.20E-01 | 3.54E-01 | 0.00E+00 | 1.28E-01 | 6.71E-02 |
| SN54 | 1.18E-01 | 3.56E-04 | 0.00E+00 | 0.00E+00 | 2.92E-01 | 0.00E+00 | 1.63E-01 | 1.98E-01 | 6.07E-04 | 5.11E-02 | 1.77E-01 |
| SN55 | 0.00E+00 | 0.00E+00 | 3.35E-04 | 6.28E-05 | 2.09E-05 | 0.00E+00 | 5.71E-02 | 4.19E-05 | 0.00E+00 | 9.22E-01 | 2.03E-02 |
| SN56 | 3.56E-04 | 2.09E-05 | 3.56E-04 | 0.00E+00 | 0.00E+00 | 2.09E-05 | 9.71E-01 | 2.09E-05 | 1.39E-02 | 1.40E-02 | 0.00E+00 |
| SN57 | 3.68E-01 | 1.32E-02 | 0.00E+00 | 0.00E+00 | 2.37E-03 | 0.00E+00 | 1.50E-01 | 2.81E-01 | 9.06E-03 | 1.92E-02 | 1.57E-01 |
| SN58 | 2.64E-01 | 1.88E-04 | 1.05E-04 | 0.00E+00 | 1.79E-01 | 6.28E-05 | 3.13E-01 | 8.79E-04 | 6.70E-04 | 2.42E-01 | 1.05E-04 |
| SN59 | 1.99E-01 | 5.65E-04 | 5.86E-04 | 0.00E+00 | 6.55E-02 | 0.00E+00 | 2.54E-01 | 3.43E-01 | 0.00E+00 | 9.66E-02 | 4.12E-02 |
| SN60 | 0.00E+00 | 6.56E-01 | 3.39E-01 | 0.00E+00 | 0.00E+00 | 0.00E+00 | 4.25E-03 | 4.19E-05 | 6.49E-04 | 2.09E-05 | 2.09E-05 |
| SN61 | 1.67E-04 | 7.18E-01 | 1.70E-03 | 6.49E-04 | 0.00E+00 | 0.00E+00 | 9.84E-04 | 1.47E-04 | 2.56E-02 | 2.53E-01 | 1.05E-04 |
| SN62 | 4.25E-02 | 5.61E-02 | 5.13E-03 | 0.00E+00 | 2.32E-03 | 7.02E-02 | 2.54E-01 | 1.29E-01 | 9.56E-02 | 2.17E-01 | 1.28E-01 |
| SN63 | 4.63E-03 | 7.62E-01 | 3.14E-04 | 5.02E-04 | 1.18E-02 | 8.98E-02 | 1.11E-01 | 3.20E-03 | 1.15E-02 | 4.96E-03 | 4.61E-04 |
| SN64 | 4.10E-03 | 9.25E-01 | 3.47E-03 | 0.00E+00 | 1.67E-04 | 5.30E-03 | 1.79E-02 | 3.56E-04 | 4.20E-02 | 2.93E-04 | 1.07E-03 |
| SN65 | 1.26E-04 | 9.64E-01 | 1.15E-03 | 5.11E-03 | 0.00E+00 | 5.80E-03 | 1.52E-02 | 1.88E-04 | 8.69E-03 | 0.00E+00 | 2.30E-04 |
| SN66 | 0.00E+00 | 1.97E-03 | 9.96E-01 | 2.09E-04 | 0.00E+00 | 1.61E-03 | 8.37E-05 | 0.00E+00 | 0.00E+00 | 2.30E-04 | 0.00E+00 |
| SN67 | 1.21E-03 | 8.55E-01 | 2.96E-02 | 8.48E-02 | 7.33E-04 | 1.47E-02 | 7.85E-03 | 1.67E-03 | 6.49E-04 | 4.19E-05 | 3.85E-03 |
| SN68 | 7.56E-03 | 3.24E-03 | 2.37E-03 | 0.00E+00 | 2.72E-03 | 1.42E-01 | 5.03E-01 | 1.06E-02 | 2.89E-01 | 2.03E-02 | 1.95E-02 |
| SN69 | 9.84E-04 | 4.01E-01 | 8.79E-04 | 0.00E+00 | 6.07E-04 | 2.75E-01 | 3.40E-02 | 2.60E-03 | 2.80E-01 | 1.40E-03 | 3.75E-03 |

| S2.5 At the genus level |                  |                  |                   |                    |                   |          |                   |               |                    |                     |                    |
|-------------------------|------------------|------------------|-------------------|--------------------|-------------------|----------|-------------------|---------------|--------------------|---------------------|--------------------|
| samp                    | <i>Acinetoba</i> | <i>Actinomyd</i> | <i>Corynebact</i> | <i>Enterococci</i> | <i>Klebsiella</i> | Others   | <i>Prevotella</i> | <i>Rothia</i> | <i>Staphylococ</i> | <i>Streptococci</i> | <i>Veillonella</i> |
| SN01                    | 0.00257          | 0.0146           | 0.000126          | 0                  | 0                 | 0.468139 | 0.222             | 0.0235        | 0                  | 0.226               | 0.0433             |
| SN02                    | 0                | 0.00812          | 0                 | 0.000523           | 0.00421           | 0.048252 | 0.214             | 0.0951        | 0                  | 0.324               | 0.306              |
| SN03                    | 0.0429           | 0.0481           | 0                 | 0                  | 0                 | 0.521729 | 0.0805            | 0.0125        | 0                  | 0.0936              | 0.201              |
| SN04                    | 0                | 0.287            | 0.00383           | 0                  | 0                 | 0.134855 | 0.0357            | 0.0956        | 2.09E-05           | 0.407               | 0.0355             |
| SN05                    | 0.147            | 0                | 0                 | 0                  | 0.659             | 0.193008 | 0.00151           | 0             | 0                  | 0                   | 0.0000419          |
| SN06                    | 0.749            | 0.00454          | 0.00496           | 0.00103            | 0.109             | 0.097216 | 0.0128            | 0             | 0                  | 0.0116              | 0.00925            |
| SN07                    | 0.00182          | 0.144            | 6.28E-05          | 0                  | 0.000167          | 0.416203 | 0.0773            | 0.047         | 0                  | 0.183               | 0.131              |
| SN08                    | 0.00245          | 0.309            | 0.00153           | 0.0000419          | 0                 | 0.182667 | 0.0879            | 0.0813        | 8.37E-05           | 0.213               | 0.122              |
| SN09                    | 0                | 0.149            | 0.000188          | 0                  | 0.0000209         | 0.26659  | 0.0578            | 0.0767        | 0                  | 0.377               | 0.0728             |
| SN10                    | 0.000816         | 0.115            | 0.0068            | 0                  | 0                 | 0.346535 | 0.00176           | 0.000586      | 0.431              | 0.0813              | 0.0158             |
| SN11                    | 0                | 0.000712         | 0.984             | 0.0000209          | 0                 | 0.009588 | 0.000837          | 0.00023       | 0.00404            | 0.000126            | 0.00023            |
| SN12                    | 0.00255          | 0.00548          | 0.00479           | 0                  | 0.000356          | 0.04304  | 0.00214           | 0.000816      | 0.933              | 0.00532             | 0.00251            |
| SN13                    | 0.00228          | 0.017            | 0.00224           | 0                  | 0.000942          | 0.484132 | 0.0682            | 0.0546        | 0.00515            | 0.268               | 0.0976             |
| SN14                    | 0.000565         | 0.000147         | 0.0675            | 0.272              | 0.000293          | 0.067239 | 6.28E-05          | 0.0000209     | 0.592              | 0.000209            | 0.0000837          |
| SN15                    | 0.00255          | 0.0409           | 0.00144           | 0.0000628          | 0.000712          | 0.87019  | 0.027             | 0.00398       | 0                  | 0.0147              | 0.0385             |
| SN16                    | 0                | 0.13             | 0.0278            | 0                  | 0.00044           | 0.222273 | 0.396             | 0.0375        | 0.00368            | 0.124               | 0.0584             |
| SN17                    | 0                | 0.72             | 0.0152            | 0                  | 0.0000419         | 0.136592 | 0.0365            | 0.0815        | 0                  | 0.00649             | 0.00383            |
| SN18                    | 0.000649         | 0.000837         | 0.964             | 0.000544           | 0.000209          | 0.033075 | 0.000481          | 0.0000209     | 0                  | 0.00023             | 0.0000628          |
| SN19                    | 0                | 0.0404           | 0.000147          | 0.000147           | 0                 | 0.132238 | 0.0363            | 0.000147      | 0.0312             | 0.701               | 0.0586             |
| SN20                    | 0                | 0.109            | 0                 | 0.00775            | 0                 | 0.04013  | 0.131             | 0.0000628     | 0.00268            | 0.000481            | 0.708              |
| SN21                    | 2.09E-05         | 0.157            | 0.000754          | 0                  | 0                 | 0.125204 | 0.365             | 0.0136        | 0                  | 0.188               | 0.15               |
| SN22                    | 0.000105         | 0.241            | 0.00528           | 0                  | 0                 | 0.20023  | 0.0408            | 0.0547        | 2.09E-05           | 0.375               | 0.0826             |
| SN23                    | 0                | 0.76             | 2.09E-05          | 0                  | 0.0000209         | 0.07377  | 0.112             | 0.0094        | 0                  | 0.0114              | 0.033              |
| SN24                    | 0.00117          | 0.00314          | 0.00283           | 0                  | 0.000502          | 0.028951 | 0.00335           | 0.000565      | 0.956              | 0.00172             | 0.00144            |
| SN25                    | 0                | 0.307            | 0.000963          | 0                  | 0.000272          | 0.106071 | 0.284             | 0.0209        | 0.000377           | 0.149               | 0.132              |
| SN26                    | 0                | 0.449            | 0.00628           | 0                  | 0.0000419         | 0.041972 | 0.000105          | 0.126         | 0.000167           | 0.294               | 0.0823             |
| SN27                    | 0                | 0.173            | 0.00136           | 0.0000209          | 0.000126          | 0.070086 | 0.0703            | 0.0567        | 0                  | 0.596               | 0.0321             |
| SN28                    | 0.00151          | 0.0634           | 0.00465           | 0                  | 0                 | 0.396546 | 0.0934            | 0.314         | 8.37E-05           | 0.118               | 0.00865            |

|      |          |          |          |           |           |          |          |           |          |           |           |
|------|----------|----------|----------|-----------|-----------|----------|----------|-----------|----------|-----------|-----------|
| SN29 | 0.000105 | 0.149    | 0.0255   | 0         | 0         | 0.281243 | 0.299    | 0.151     | 0.000126 | 0.0322    | 0.0622    |
| SN30 | 0.161    | 0.00105  | 0.147    | 0.0000209 | 0.518     | 0.160331 | 0.00329  | 0         | 0.000565 | 0.0000837 | 0.00862   |
| SN31 | 0.000649 | 0.0305   | 0.000481 | 0         | 0.101     | 0.862822 | 0.00023  | 0         | 0        | 0.0000209 | 0.00429   |
| SN32 | 0        | 0.253    | 0.306    | 0         | 0         | 0.309839 | 0.0334   | 0.0158    | 0.00188  | 0.0523    | 0.0283    |
| SN33 | 2.09E-05 | 0.0358   | 0        | 0         | 0         | 0.560687 | 0.0472   | 0.145     | 0.00207  | 0.174     | 0.0353    |
| SN34 | 0.000733 | 0.0721   | 0.00023  | 0         | 0.0000209 | 0.113858 | 0.153    | 0.00967   | 0.00134  | 0.225     | 0.424     |
| SN35 | 0        | 0.184    | 0.00119  | 0         | 0         | 0.206887 | 0.206    | 0.0525    | 0        | 0.185     | 0.165     |
| SN36 | 6.28E-05 | 0.00714  | 0.0838   | 0.00542   | 0.0000628 | 0.022587 | 0.0251   | 0.0221    | 0.531    | 0.261     | 0.0417    |
| SN37 | 0        | 0.107    | 0.00023  | 0         | 0         | 0.275089 | 0.338    | 0.00197   | 0.000565 | 0.0454    | 0.231     |
| SN38 | 0.000502 | 0.000419 | 0.0263   | 0.000481  | 0.00469   | 0.030898 | 0.000126 | 0.0000837 | 0.934    | 0.00144   | 0.00142   |
| SN39 | 6.28E-05 | 0.0173   | 0.0027   | 0         | 0.0000419 | 0.409525 | 0.162    | 0.0991    | 0.000544 | 0.156     | 0.153     |
| SN40 | 0.949    | 0.00157  | 8.37E-05 | 0.000858  | 0         | 0.014779 | 0.000921 | 0.00165   | 0.0203   | 0.000628  | 0.00996   |
| SN41 | 0        | 0.046    | 0.00819  | 0         | 0         | 0.202428 | 0.0688   | 0.0565    | 2.09E-05 | 0.488     | 0.13      |
| SN42 | 2.09E-05 | 0.000377 | 0.42     | 0         | 0         | 0.018191 | 6.28E-05 | 0.00542   | 0.00297  | 0.509     | 0.044     |
| SN43 | 0        | 0.00674  | 0.789    | 0         | 0.0105    | 0.166925 | 0.0216   | 0.000754  | 2.09E-05 | 0.00404   | 0.000167  |
| SN44 | 0        | 0.542    | 0.00121  | 0         | 0.0000419 | 0.144023 | 0.081    | 0.048     | 0        | 0.165     | 0.0185    |
| SN45 | 0        | 0.0268   | 0.00257  | 0         | 0         | 0.370672 | 0.0513   | 0.15      | 2.09E-05 | 0.323     | 0.0759    |
| SN46 | 0        | 0.118    | 0.00475  | 0         | 0.00172   | 0.146891 | 0.035    | 0.0683    | 8.37E-05 | 0.584     | 0.041     |
| SN47 | 0        | 0.0362   | 0.0418   | 0.0013    | 0         | 0.413607 | 0.215    | 0         | 0.000209 | 0.289     | 0.00251   |
| SN48 | 0        | 0        | 0.00272  | 0.88      | 0         | 0.112142 | 0        | 0         | 2.09E-05 | 0.0049    | 0.0000628 |
| SN49 | 0        | 0        | 0.751    | 0.243     | 0         | 0.004961 | 6.28E-05 | 0         | 0.00111  | 0         | 0.000272  |
| SN50 | 0.000607 | 2.09E-05 | 0.00203  | 0.645     | 0.282     | 0.069709 | 0        | 0         | 4.19E-05 | 0         | 0         |
| SN51 | 4.19E-05 | 0.001    | 0        | 0.00153   | 0.0000209 | 0.213251 | 0.0972   | 0.000209  | 0.243    | 0.398     | 0.0452    |
| SN52 | 0        | 0.169    | 8.37E-05 | 0.000147  | 0.000188  | 0.254072 | 0.329    | 0.0252    | 0        | 0.0778    | 0.144     |
| SN53 | 0        | 0.28     | 0.00283  | 0.0000209 | 0         | 0.152774 | 0.333    | 0.0472    | 0        | 0.128     | 0.0562    |
| SN54 | 0        | 0.117    | 0.000356 | 0         | 0         | 0.179736 | 0.188    | 0.292     | 0.000607 | 0.0511    | 0.17      |
| SN55 | 0        | 0        | 0        | 0.0000628 | 0.000272  | 0.057149 | 4.19E-05 | 0.0000209 | 0        | 0.922     | 0.0203    |
| SN56 | 2.09E-05 | 0.000356 | 2.09E-05 | 0         | 0         | 0.971656 | 2.09E-05 | 0         | 0.0139   | 0.014     | 0         |
| SN57 | 0        | 0.368    | 0.0132   | 0         | 0         | 0.233912 | 0.263    | 0.00234   | 0.00906  | 0.0192    | 0.0914    |
| SN58 | 4.19E-05 | 0.264    | 0.000188 | 0         | 0         | 0.312686 | 0.000879 | 0.179     | 0.00067  | 0.242     | 0.0000628 |
| SN59 | 0        | 0.198    | 0.000565 | 0         | 0.00044   | 0.273435 | 0.331    | 0.0655    | 0        | 0.0966    | 0.0345    |
| SN60 | 0        | 0        | 0.656    | 0         | 0.0000209 | 0.342935 | 4.19E-05 | 0         | 0.000649 | 0.0000209 | 0.0000209 |
| SN61 | 0        | 0.000167 | 0.718    | 0.000649  | 0.00117   | 0.001528 | 0.000147 | 0         | 0.0256   | 0.253     | 0.0000837 |
| SN62 | 0.0252   | 0.0425   | 0.0561   | 0         | 0         | 0.34283  | 0.119    | 0.00188   | 0.0956   | 0.217     | 0.1       |
| SN63 | 0.0116   | 0.00264  | 0.762    | 0.000502  | 0         | 0.201905 | 0.00297  | 0.00214   | 0.0115   | 0.00481   | 0.000419  |
| SN64 | 0.005    | 0.0041   | 0.925    | 0         | 0.00291   | 0.018987 | 0.000293 | 0.000167  | 0.042    | 0.000272  | 0.001     |
| SN65 | 0.0053   | 0.000126 | 0.964    | 0.00511   | 0.000837  | 0.016035 | 0.000126 | 0         | 0.00869  | 0         | 0.00023   |
| SN66 | 0.00161  | 0        | 0.00197  | 0.000209  | 0.771     | 0.224702 | 0        | 0         | 0        | 0.00023   | 0         |
| SN67 | 0.0147   | 0.00121  | 0.855    | 0.0848    | 0.0221    | 0.019405 | 0.00153  | 0.00067   | 0.000649 | 0.0000419 | 0         |
| SN68 | 0.0466   | 0.00728  | 0.00324  | 0         | 0         | 0.603684 | 0.0104   | 0.000167  | 0.289    | 0.0201    | 0.0195    |
| SN69 | 0.00379  | 0.000984 | 0.401    | 0         | 0.00044   | 0.307201 | 0.00234  | 0.000565  | 0.279    | 0.0014    | 0.00264   |

**Supplementary Table S3: Comparison the relative abundance of the top 10 bacterial microbiome between mild and severe groups**

| Levels | Microbiome                         | p_value |
|--------|------------------------------------|---------|
| phylum | <i>Actinobacteria</i>              | 0.826   |
|        | <i>Bacteroidetes</i>               | 0.006   |
|        | <i>Candidatus_Saccharibacteria</i> | 0.011   |
|        | <i>Cyanobacteria</i>               | 0.658   |
|        | <i>Firmicutes</i>                  | 0.104   |
|        | <i>Fusobacteria</i>                | 0.001   |
|        | <i>Proteobacteria</i>              | 0.219   |
|        | <i>Spirochaetes</i>                | <0.001  |
|        | <i>Synergistetes</i>               | 0.001   |
|        | <i>Tenericutes</i>                 | 0.901   |
| class  | <i>Actinobacteria</i>              | 0.826   |
|        | <i>Bacilli</i>                     | 0.406   |
|        | <i>Bacteroidia</i>                 | 0.001   |
|        | <i>Betaproteobacteria</i>          | 0.092   |
|        | <i>Clostridia</i>                  | <0.001  |
|        | <i>Epsilonproteobacteria</i>       | 0.058   |
|        | <i>Flavobacteriia</i>              | 0.037   |
|        | <i>Fusobacteriia</i>               | 0.001   |
|        | <i>Gammaproteobacteria</i>         | 0.139   |
|        | <i>Negativicutes</i>               | 0.008   |
| order  | <i>Actinomycetales</i>             | 0.816   |
|        | <i>Bacillales</i>                  | 0.163   |
|        | <i>Bacteroidales</i>               | 0.001   |
|        | <i>Clostridiales</i>               | <0.001  |
|        | <i>Enterobacteriales</i>           | 0.021   |
|        | <i>Fusobacteriales</i>             | 0.001   |
|        | <i>Lactobacillales</i>             | 0.328   |
|        | <i>Neisseriales</i>                | 0.011   |
|        | <i>Pseudomonadales</i>             | 0.035   |
|        | <i>Selenomonadales</i>             | 0.008   |
| family | <i>Actinomycetaceae</i>            | 0.029   |
|        | <i>Corynebacteriaceae</i>          | 0.185   |
|        | <i>Enterobacteriaceae</i>          | 0.021   |
|        | <i>Enterococcaceae</i>             | 0.232   |
|        | <i>Micrococcaceae</i>              | 0.005   |
|        | <i>Moraxellaceae</i>               | 0.068   |
|        | <i>Prevotellaceae</i>              | 0.003   |
|        | <i>Staphylococcaceae</i>           | 0.360   |
|        | <i>Streptococcaceae</i>            | 0.036   |
|        | <i>Veillonellaceae</i>             | 0.007   |
| genus  | <i>Acinetobacter</i>               | 0.047   |
|        | <i>Actinomyces</i>                 | 0.036   |
|        | <i>Corynebacterium</i>             | 0.185   |
|        | <i>Enterococcus</i>                | 0.232   |
|        | <i>Klebsiella</i>                  | 0.093   |

|              |                       |       |
|--------------|-----------------------|-------|
| <b>genus</b> | <i>Prevotella</i>     | 0.003 |
|              | <i>Rothia</i>         | 0.003 |
|              | <i>Staphylococcus</i> | 0.464 |
|              | <i>Streptococcus</i>  | 0.035 |
|              | <i>Veillonella</i>    | 0.005 |

Supplementary Table S4.1: Rank correlation coefficients between clinical characteristics and top 10 genera

|                 | Mild group |                |         |                      |               | Severe group |                |         |                     |               |
|-----------------|------------|----------------|---------|----------------------|---------------|--------------|----------------|---------|---------------------|---------------|
|                 | Age        | Inpatient days | Dyspnea | Coexisting disorders | ICU admission | Age          | Inpatient days | Dyspnea | Coexisting disorder | ICU admission |
| Acinetobacter   | -0.0987    | -0.0090        | 0.2040  | -0.0025              | 0.0364        | -0.0962      | 0.6599         | 0.6449  | 0.0786              | 0.4914        |
| Actinomyces     | -0.3235    | 0.1831         | -0.1077 | -0.0652              | -0.3542       | -0.4188      | -0.2309        | -0.3169 | -0.2060             | -0.3645       |
| Corynebacterium | 0.1654     | 0.3194         | 0.2642  | 0.2026               | 0.0000        | 0.2892       | 0.0846         | -0.1992 | 0.0000              | -0.2083       |
| Enterococcus    | 0.3429     | -0.0135        | 0.1233  | 0.1541               | 0.3737        | 0.2497       | -0.1066        | -0.1722 | 0.2425              | 0.1903        |
| Klebsiella      | -0.0086    | -0.0890        | 0.2737  | 0.0520               | 0.0968        | 0.1257       | 0.2385         | 0.2101  | 0.1063              | 0.4249        |
| Prevotella      | -0.4805    | 0.1183         | -0.1459 | -0.4188              | -0.3733       | -0.4379      | -0.0384        | -0.2219 | -0.2061             | -0.1658       |
| Rothia          | -0.2788    | 0.1238         | -0.1946 | -0.2793              | -0.3542       | -0.3514      | -0.1562        | -0.2901 | -0.1397             | -0.4189       |
| Staphylococcus  | 0.2325     | -0.1545        | 0.0317  | 0.1533               | -0.1989       | 0.1317       | -0.0465        | 0.1427  | -0.2968             | -0.2262       |
| Streptococcus   | -0.0395    | -0.1410        | -0.1667 | -0.0372              | -0.2679       | -0.2230      | -0.4267        | -0.4755 | -0.0344             | -0.5825       |
| Veillonella     | -0.2722    | 0.0224         | -0.1737 | -0.2513              | -0.3493       | -0.3580      | -0.0291        | -0.1857 | -0.1460             | -0.0663       |

Supplementary Table S4.2: Rank correlation coefficients between clinical indexes and top 10 genera

|                 | Mild group |         |         |         |                 | Severe group |         |         |         |
|-----------------|------------|---------|---------|---------|-----------------|--------------|---------|---------|---------|
|                 | WBC        | GRA     | LYMPH   | CRP     |                 | WBC          | GRA     | LYMPH   | CRP     |
| Acinetobacter   | -0.1268    | 0.0156  | -0.3227 | -0.0815 | Acinetobacter   | 0.2114       | 0.3651  | -0.4882 | 0.5200  |
| Actinomyces     | -0.2984    | -0.3624 | 0.3855  | -0.0549 | Actinomyces     | -0.2513      | -0.3736 | 0.1505  | -0.3999 |
| Corynebacterium | -0.1107    | -0.0777 | -0.1217 | -0.0963 | Corynebacterium | -0.1187      | -0.0531 | -0.0999 | 0.3857  |
| Enterococcus    | 0.0632     | 0.1539  | -0.2612 | 0.1208  | Enterococcus    | 0.0560       | 0.1439  | -0.2445 | 0.1219  |
| Klebsiella      | 0.3852     | 0.3683  | 0.0598  | 0.0305  | Klebsiella      | 0.4257       | 0.5012  | -0.2688 | 0.2939  |
| Prevotella      | -0.2149    | -0.2946 | 0.3704  | -0.1852 | Prevotella      | -0.1697      | -0.1457 | -0.0268 | -0.0120 |
| Rothia          | -0.3134    | -0.4250 | 0.3137  | -0.3012 | Rothia          | -0.2361      | -0.4184 | 0.3967  | -0.4507 |
| Staphylococcus  | -0.1716    | 0.0261  | -0.3231 | -0.1661 | Staphylococcus  | -0.2605      | -0.3033 | -0.0089 | 0.1057  |
| Streptococcus   | 0.0860     | -0.0308 | 0.2131  | -0.1446 | Streptococcus   | -0.0918      | -0.3176 | 0.5104  | -0.4611 |
| Veillonella     | -0.3069    | -0.3336 | 0.1700  | -0.1868 | Veillonella     | -0.1981      | -0.2489 | 0.0008  | -0.3234 |
